# Supplementary material for: Environmental stress drives plasticity in sexual bimaturism in the black soldier fly (Hermetia illucens)
Source: Research Square preprint supplement (doi:10.21203/rs.3.rs-8253644/v1), 2025-12-16
Supplement: Supplementary file 1 [file 3d94a55182a0061175d17340.docx]

**Supplementary Information for**

**Environmental stress drives plasticity in sexual bimaturism in the black soldier fly (*Hermetia illucens*)**

**Table of Contents:**

| **Figure S1.** Black soldier fly larvae growth curves. | Page 2 |
| --- | --- |
| **Figure S2.** Correlations between Δt and PC1. | Page 3 |
| **Figure S3.** DharmaQ-Qplot for protandry modelling. | Page 4 |
| **Figure S4.** DharmaQ-Qplot for dry adult weight modelling. | Page 5 |
| **Table S1.** Estimation of peak larval weight. | Page 6 |
| **Table S2.** Measurements of fitness related traits per sample. | Page 11 |
|  |  |
|  |  |
|  |  |


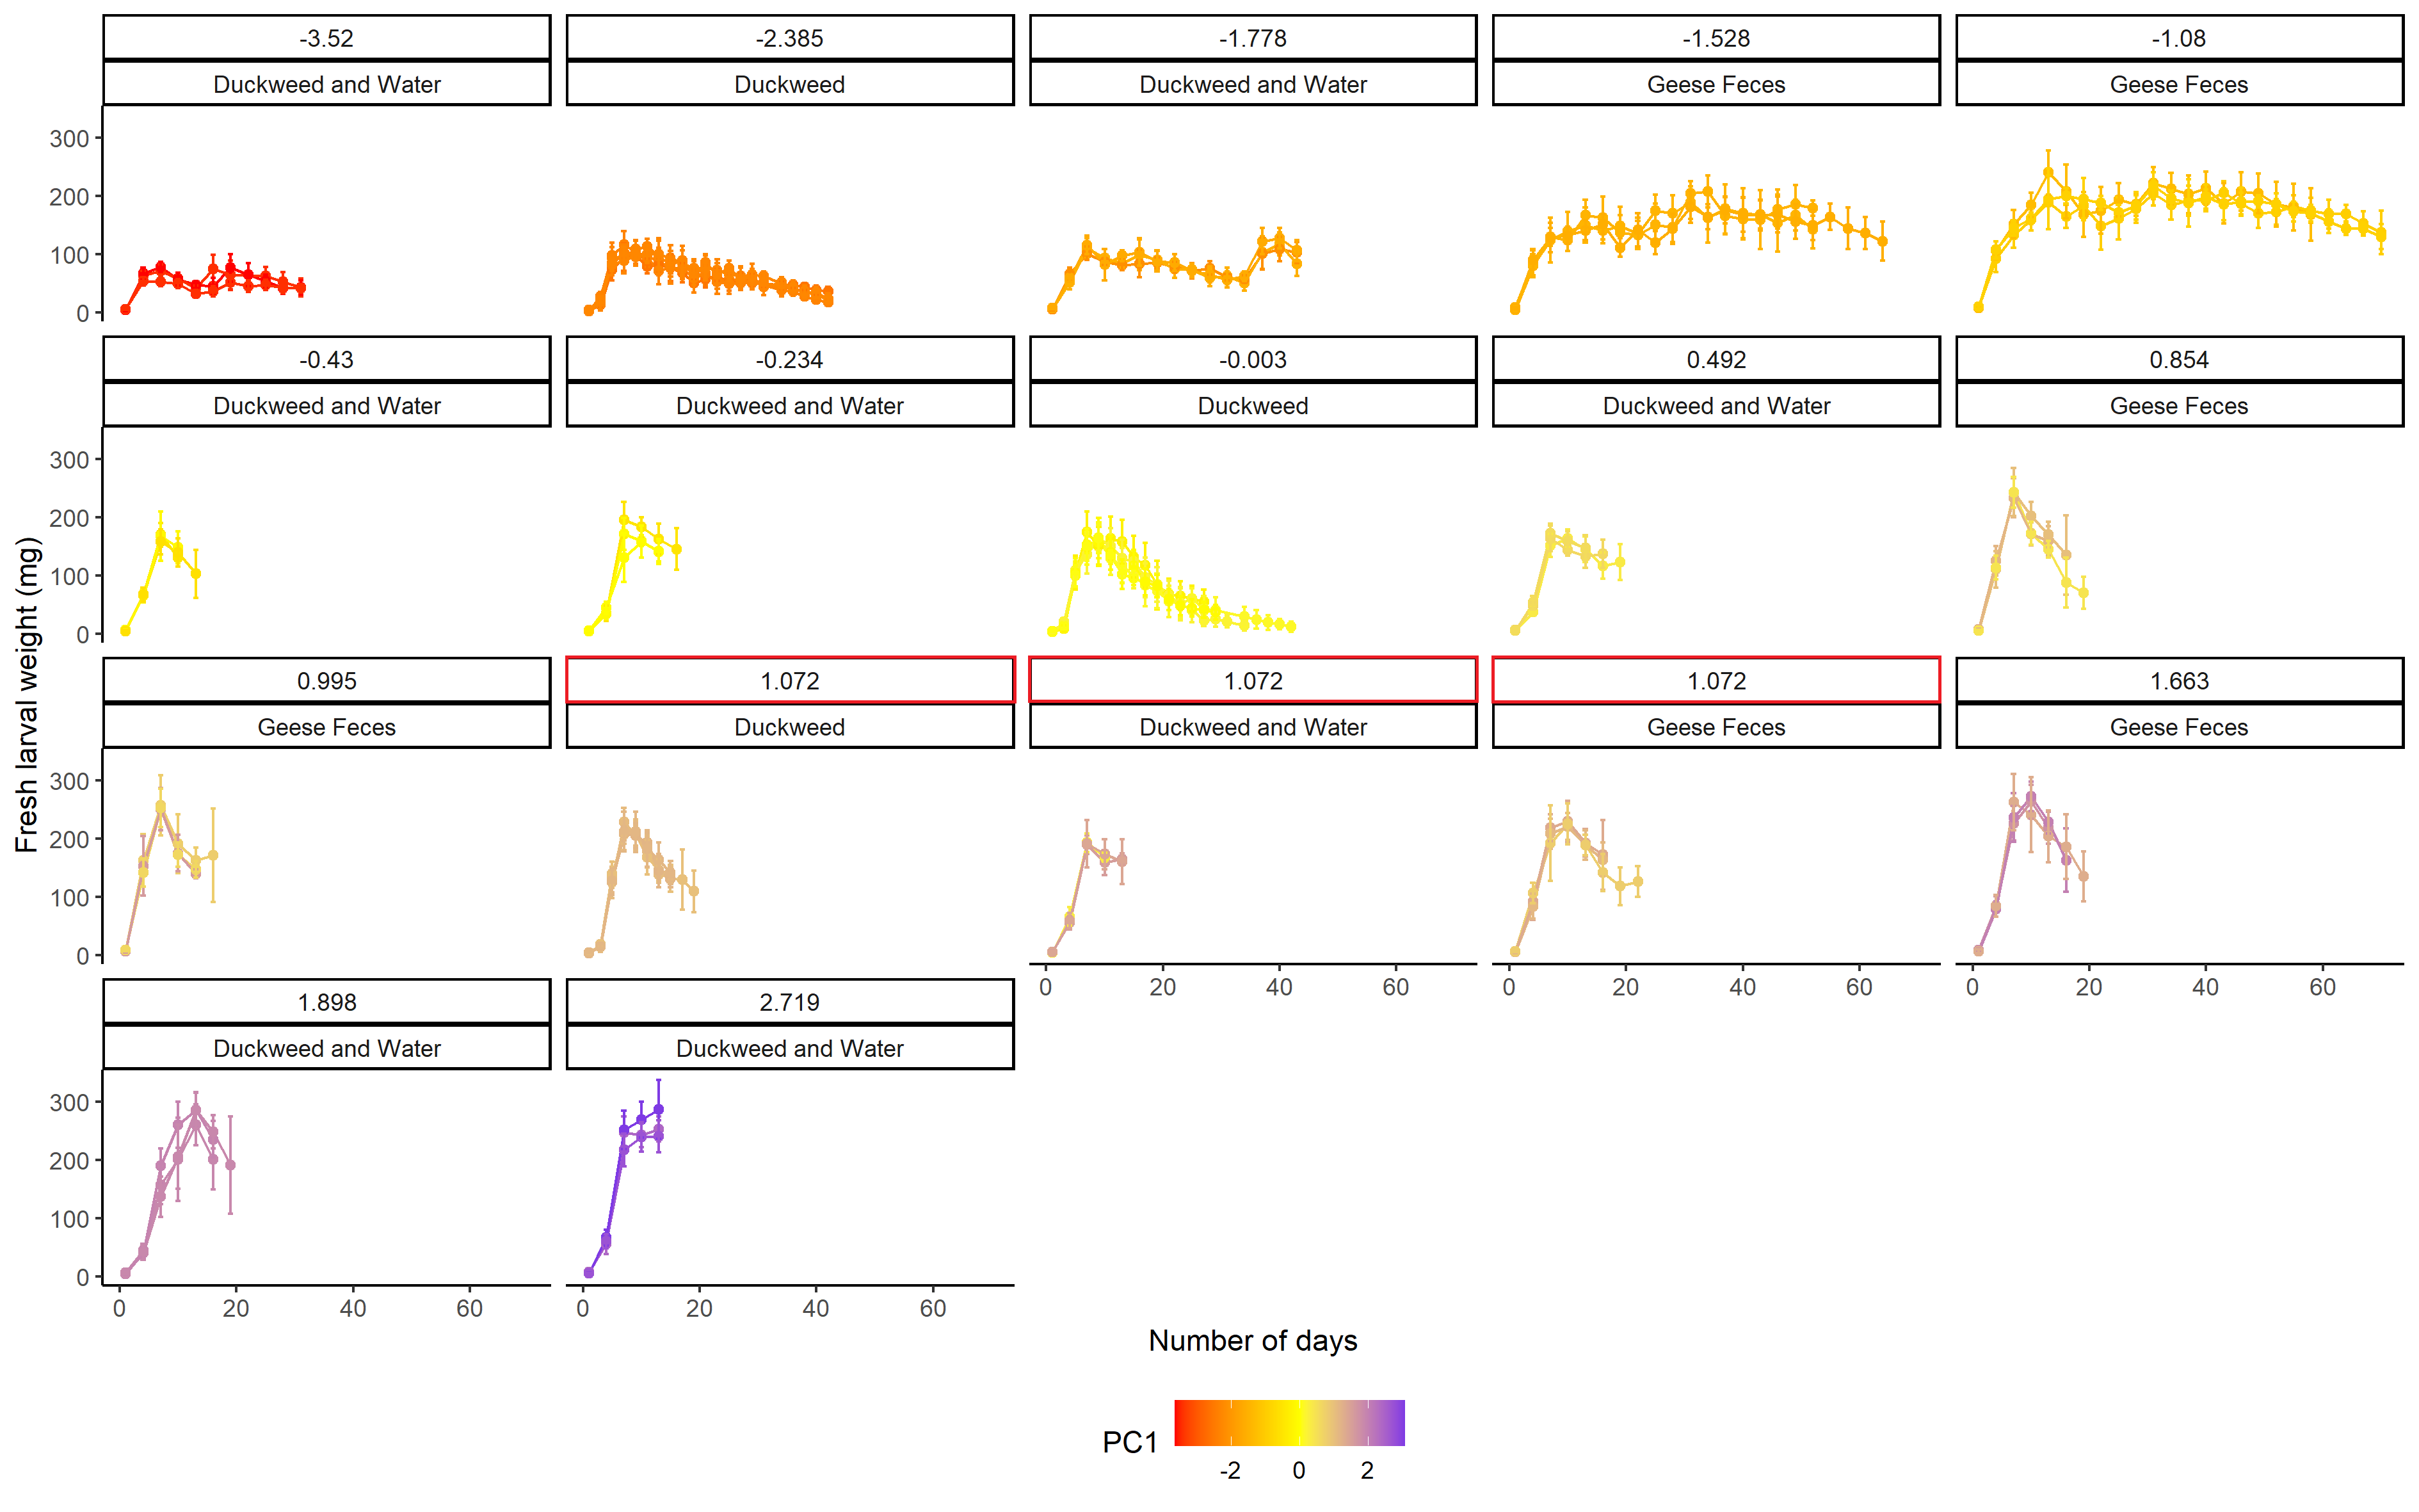


**Figure S1**. Fresh black soldier fly larvae weight across time per experimental treatment. Color gradient shows the PC1 value per replicate. Values at the top of each plot show the average PC1 value per treatment (red boxes show the controls per experiment).


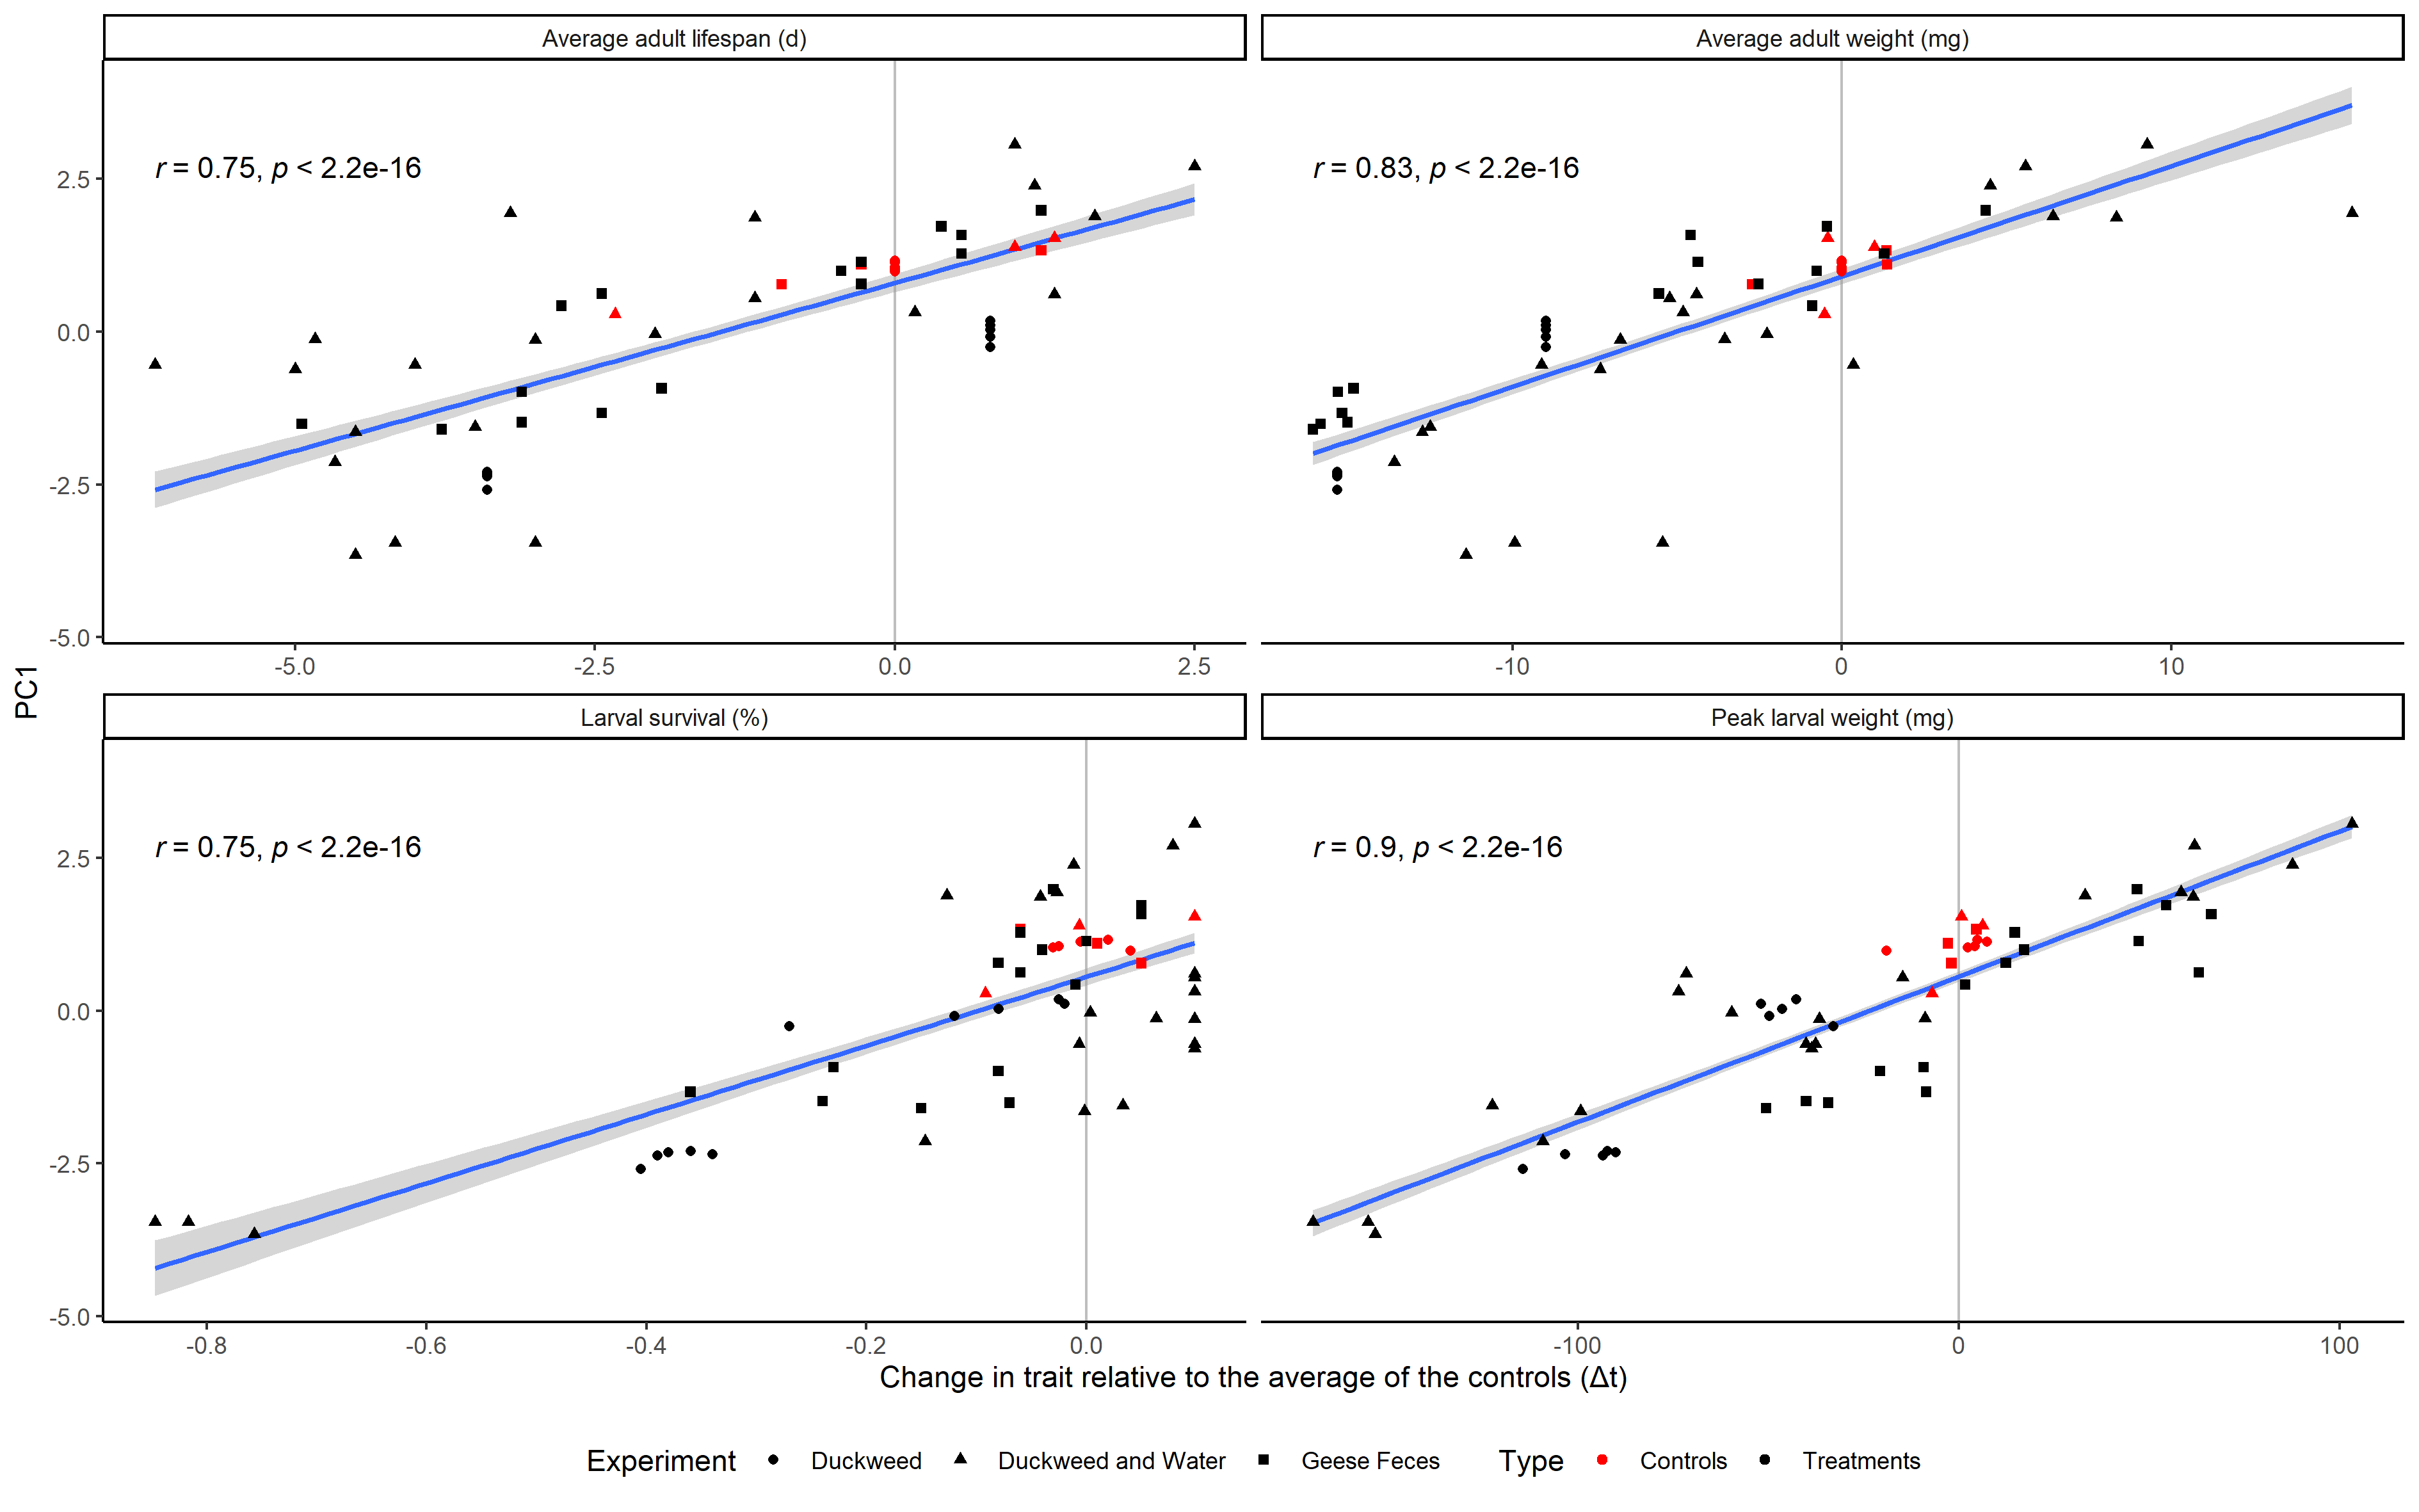


**Figure S2**. Correlations between the changes in fitness-related traits relative to the average of the controls of each experiment (Δt) and larval environmental quality (PC1). Values show the Pearson correlation coefficient and the associated P-value. Blue lines show the linear models with the model standard error as the shaded area.


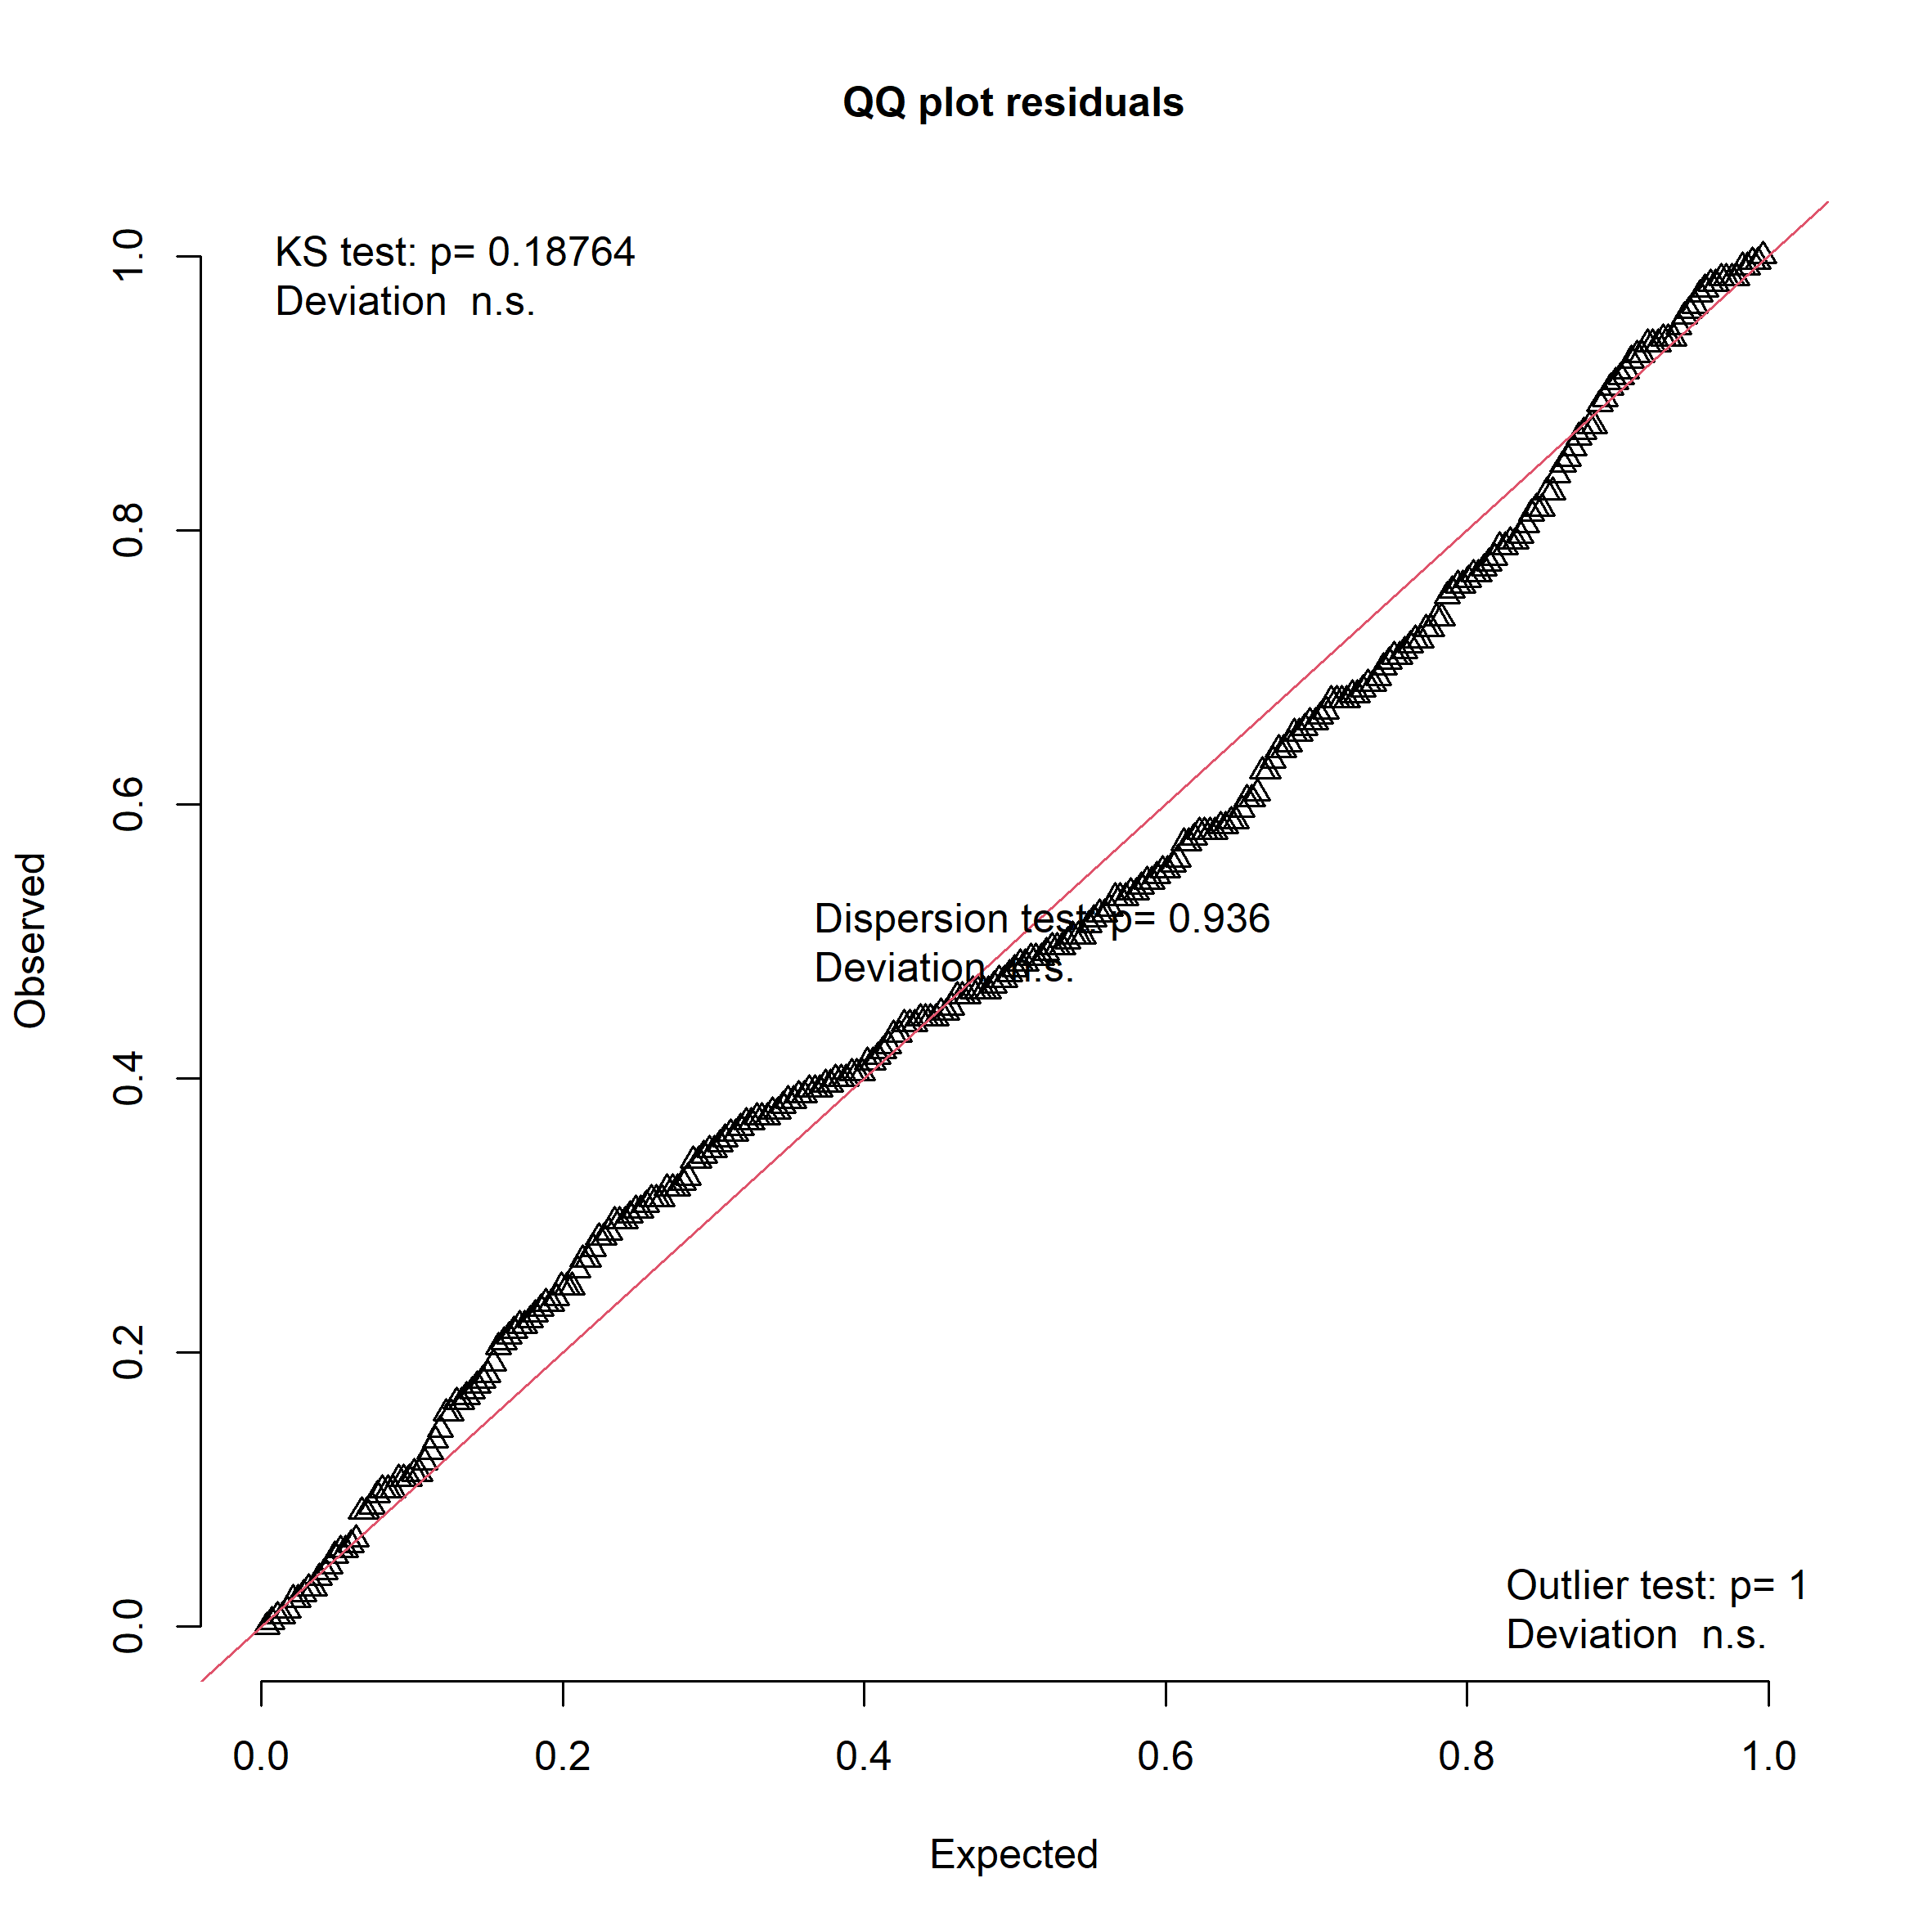


**Figure S3.** Dharma Q-Qplot for the modelling of the hyperbolic arcsine of degree of protandry (ΔQ) as predicted by the interaction between larval environmental quality (PC1) and quantiles.


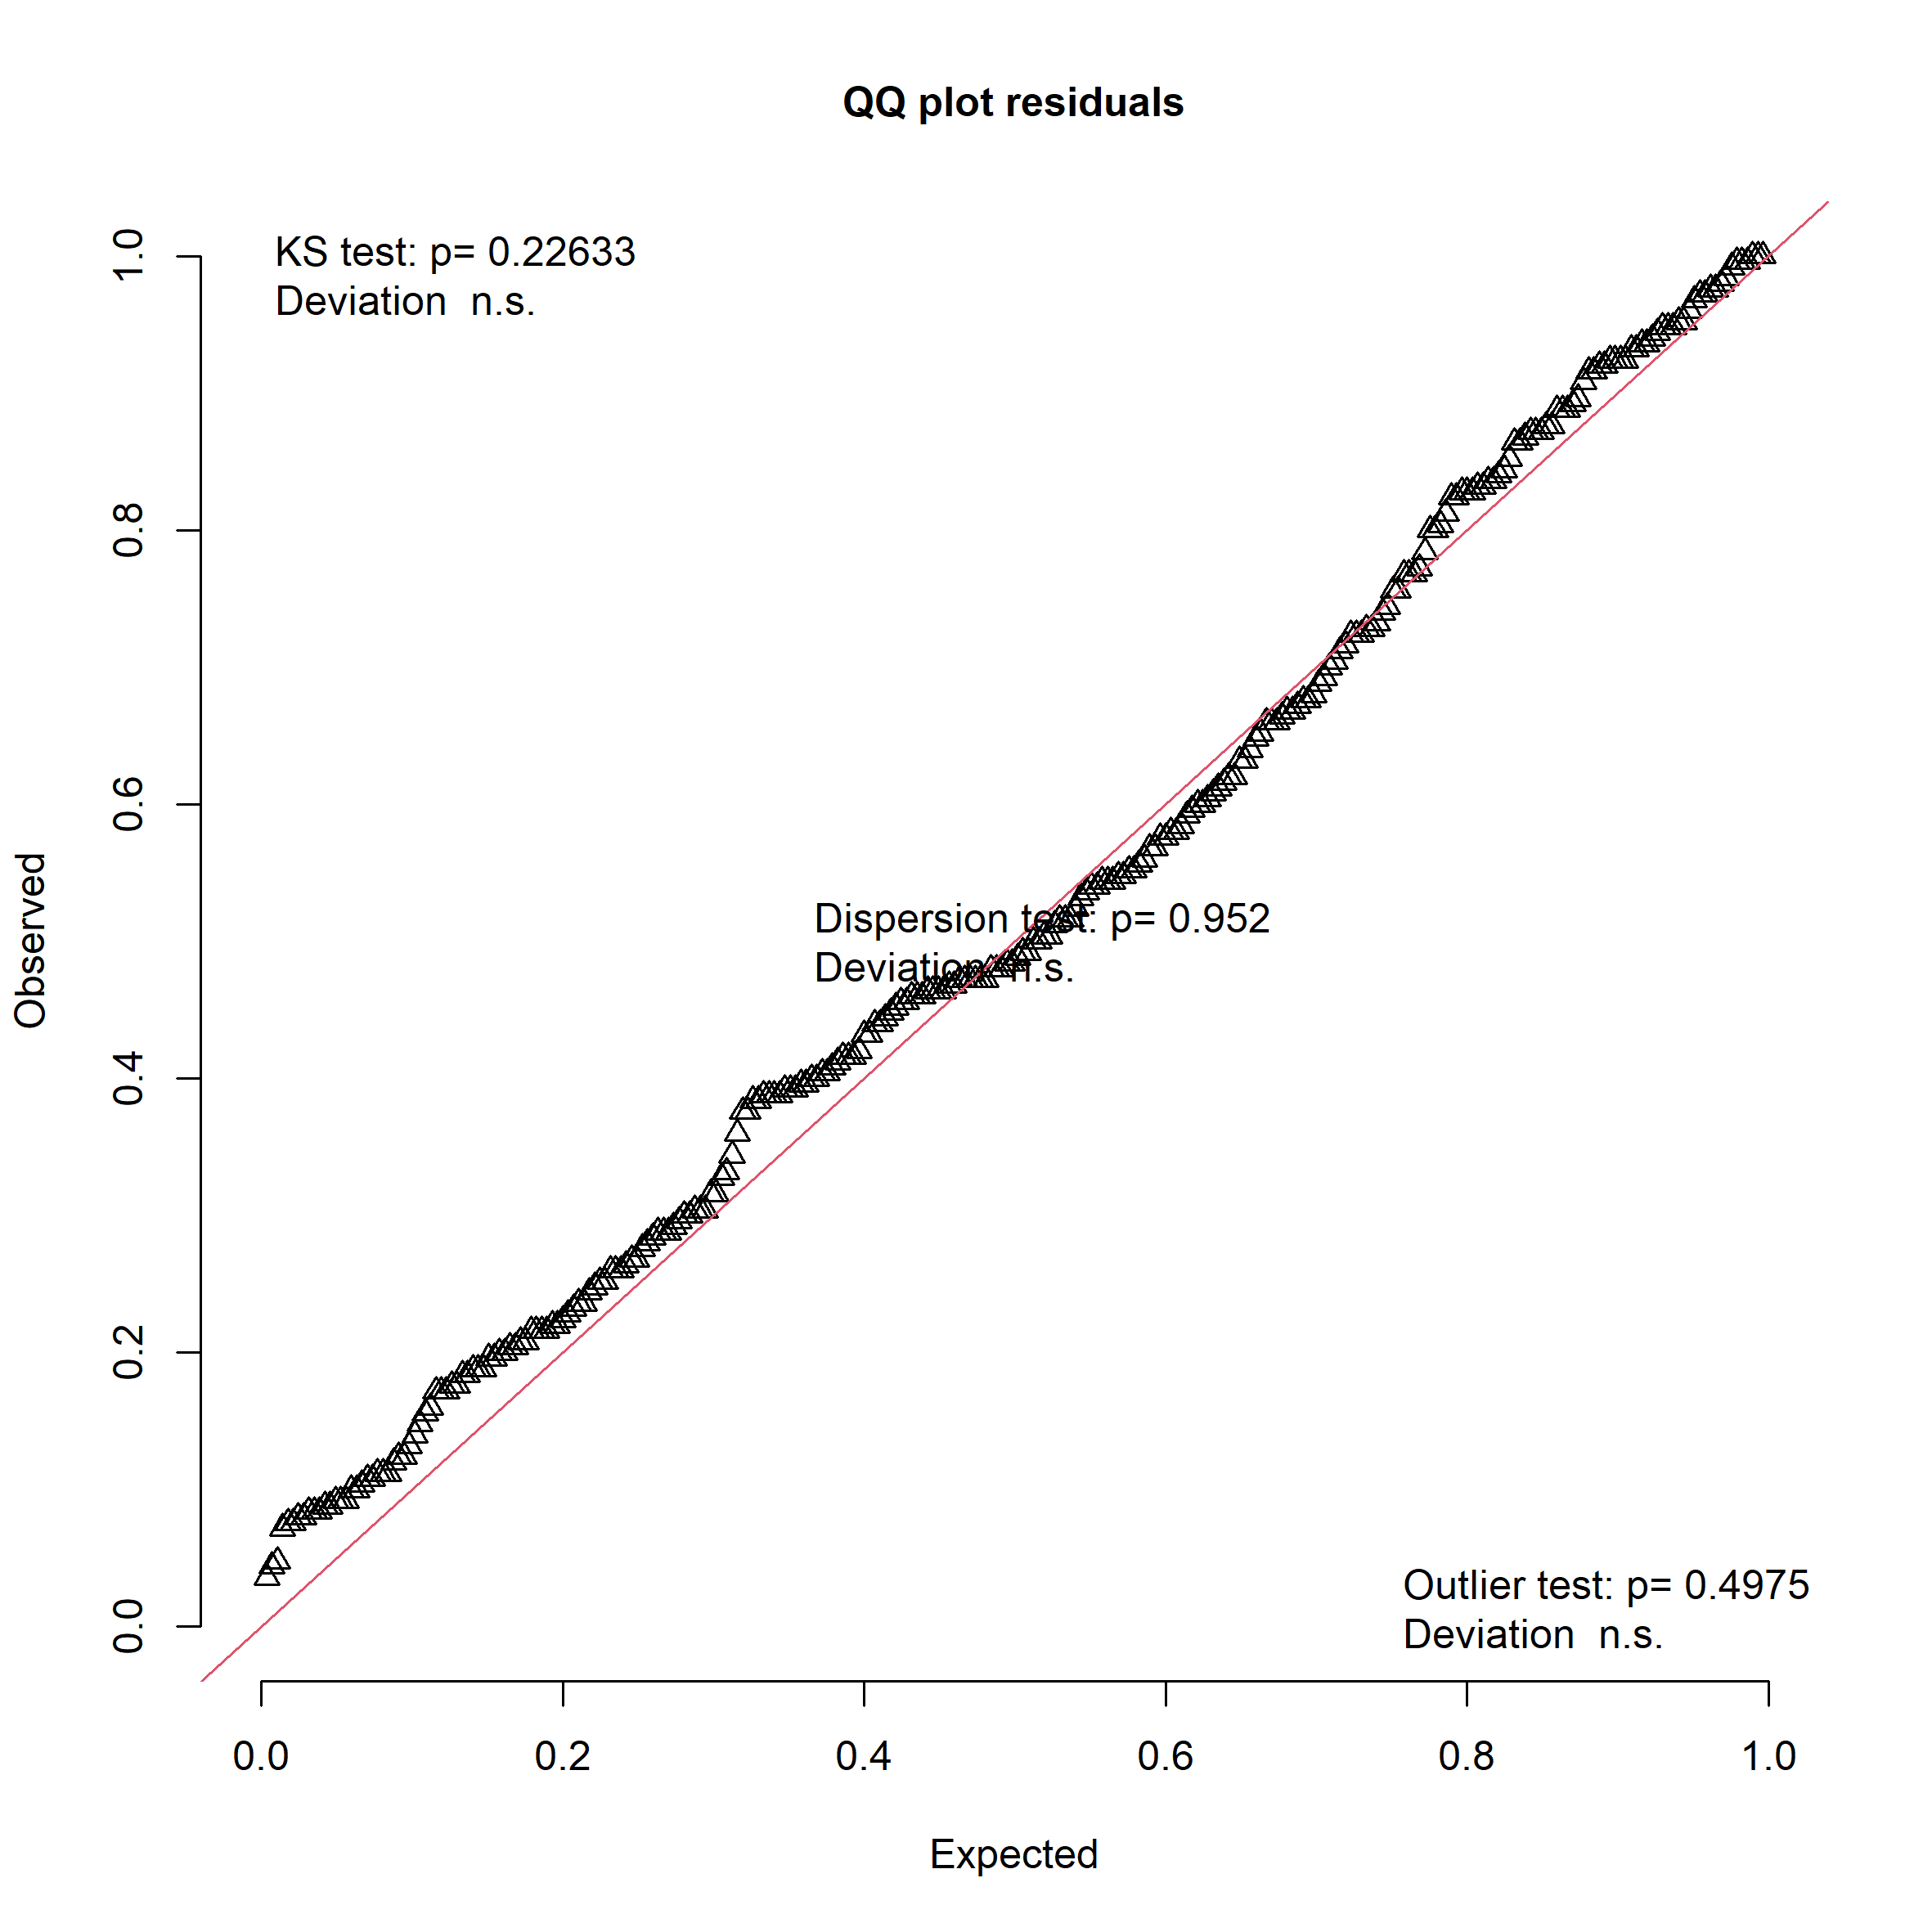


**Figure S4.** Dharma Q-Qplot for the modelling of the square root transformed dry adult weight mass as predicted by the interaction between larval environmental quality (PC1) and sex.

**Table S1.** Estimation of peak larval growth per sample. Each plot shows the fitting of the most parsimonious rTPC model (shown in the bottom right corner of each plot), as well as the predicted maximum larval weight.


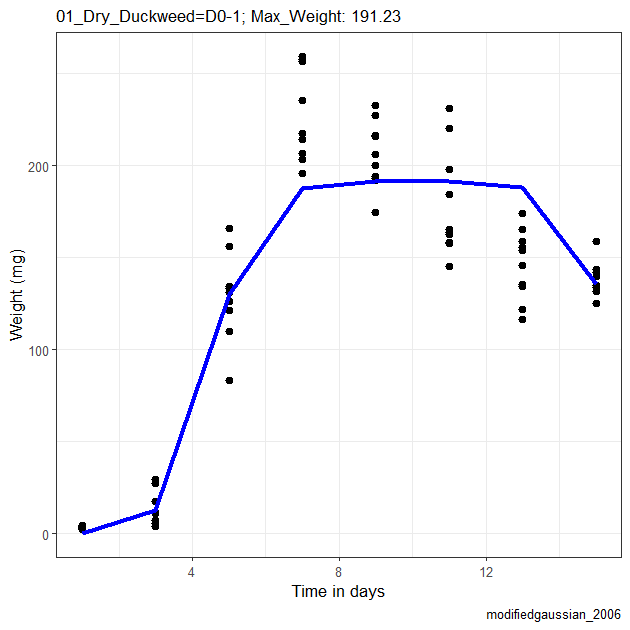

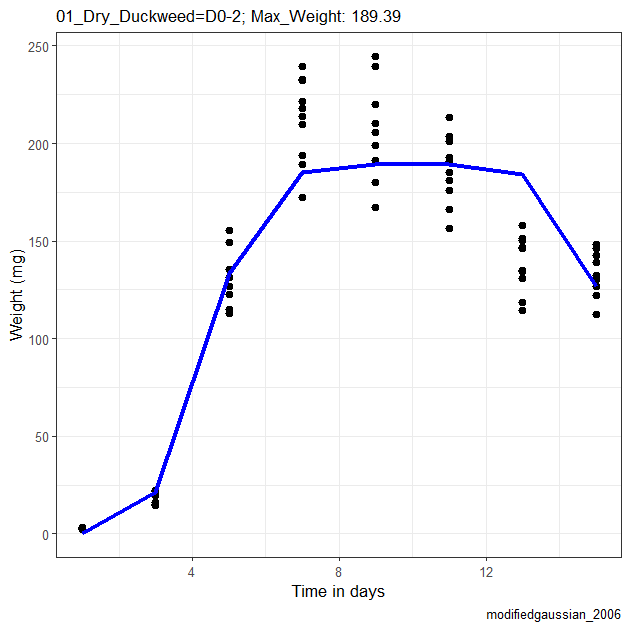

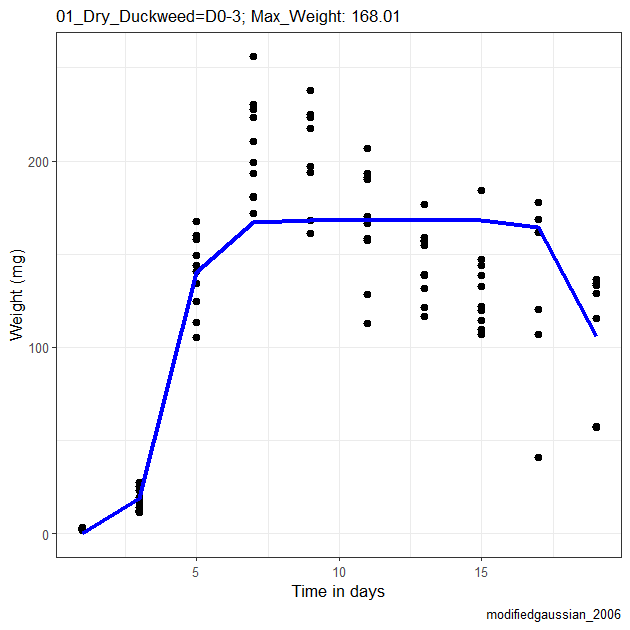

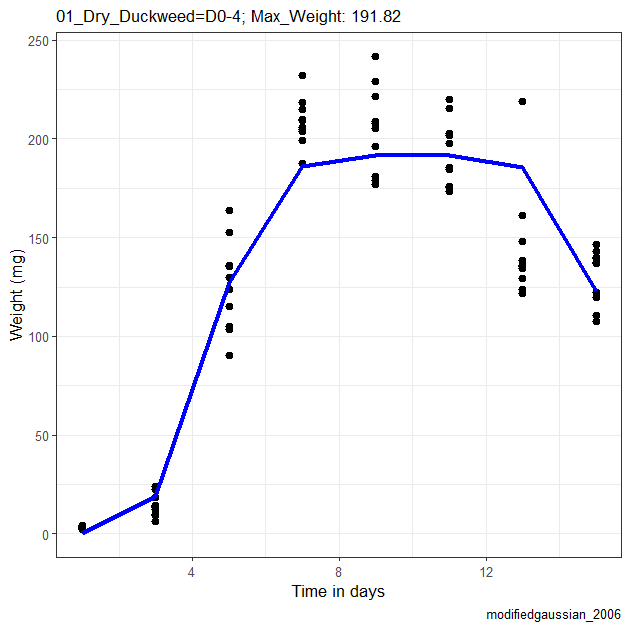

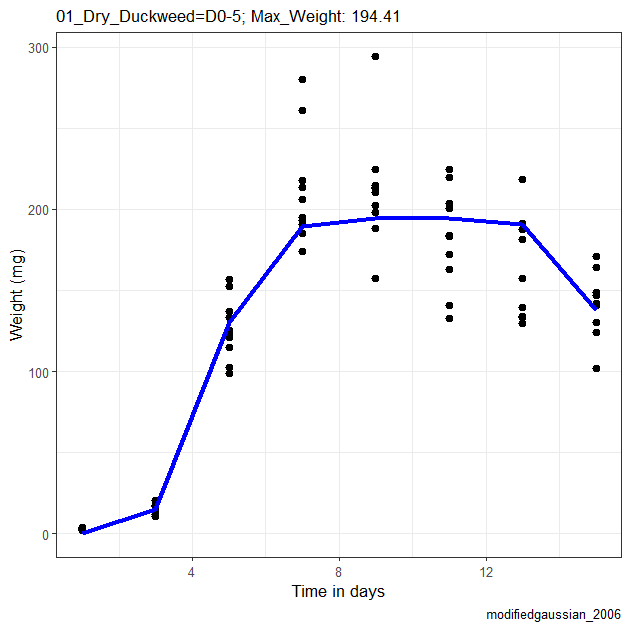

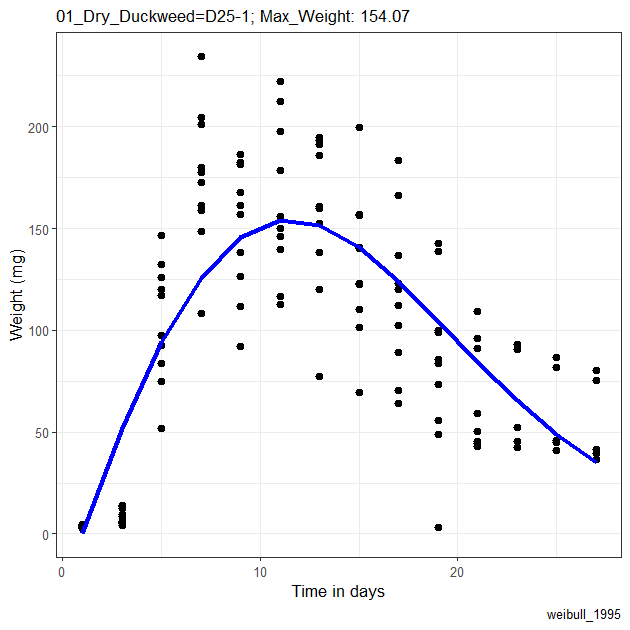

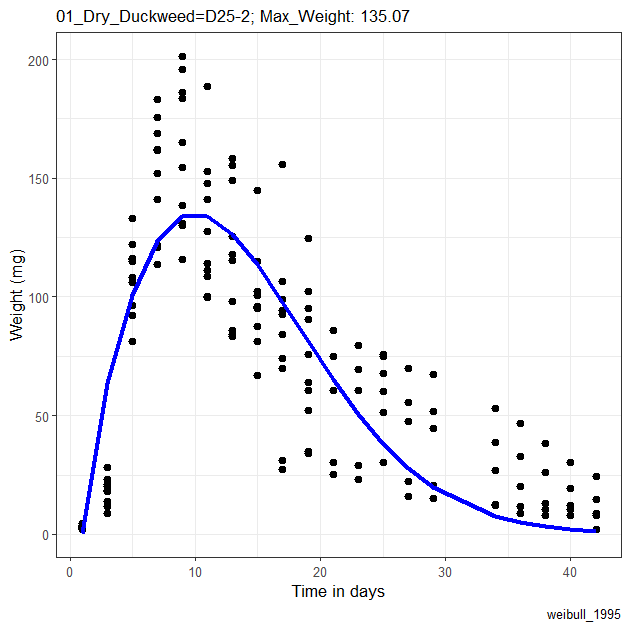

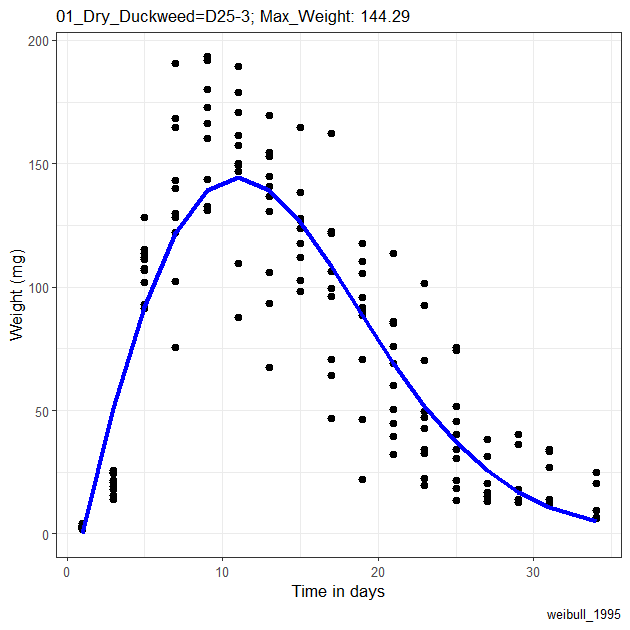

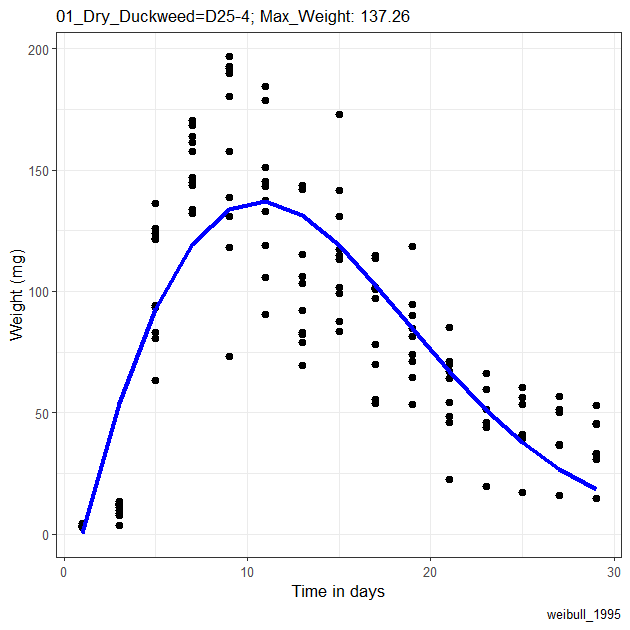

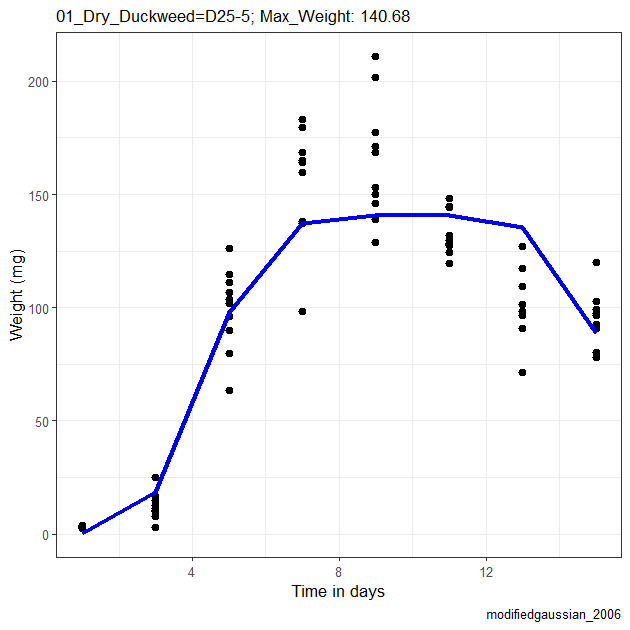

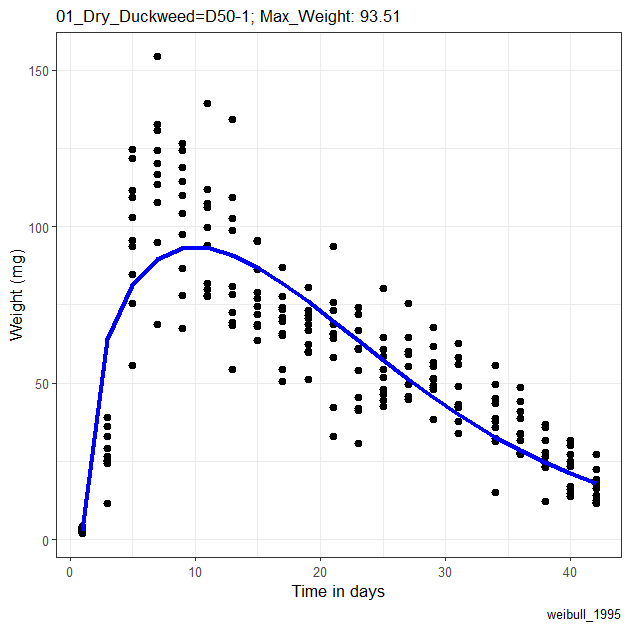

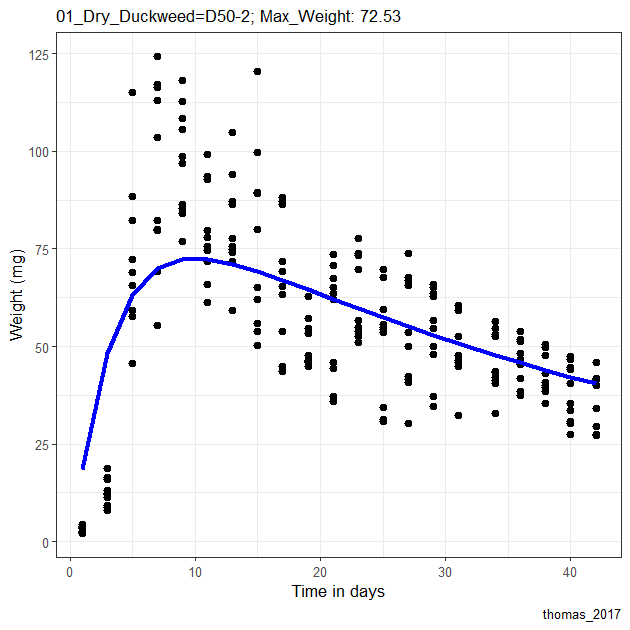

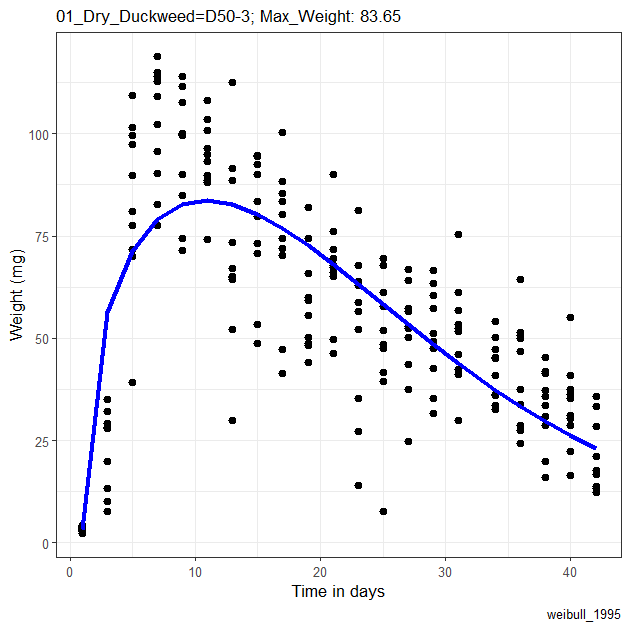

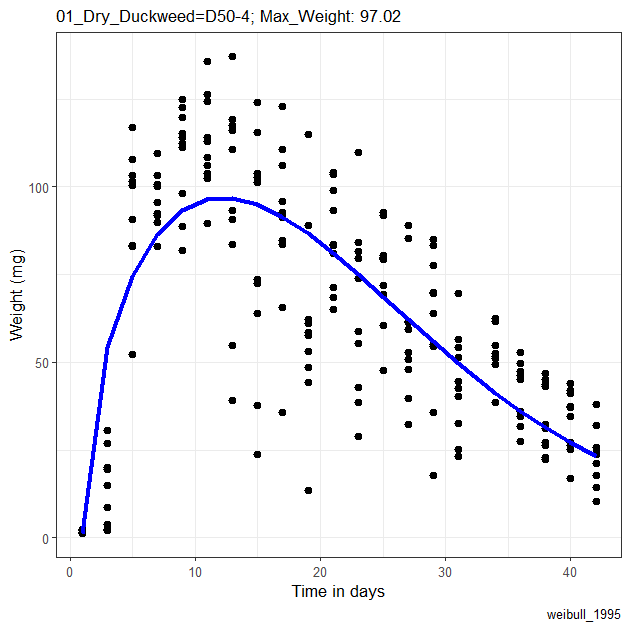

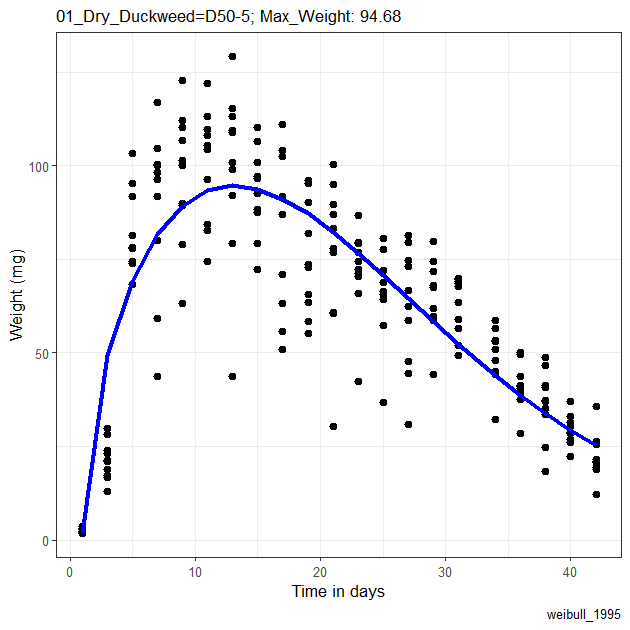

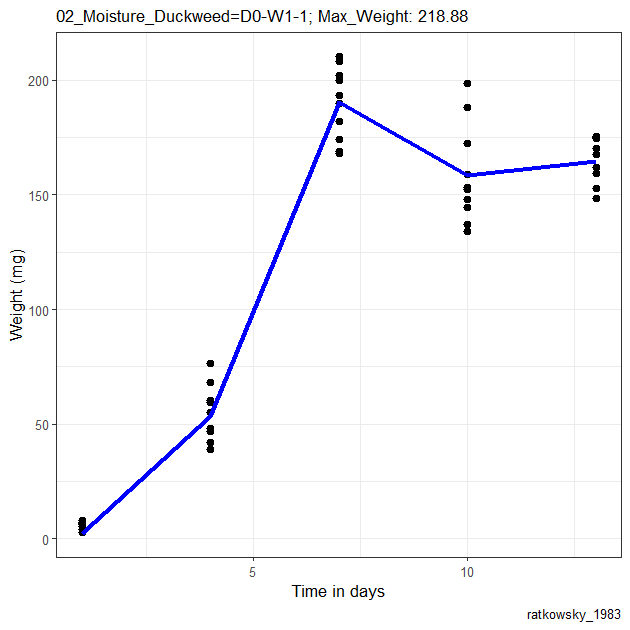

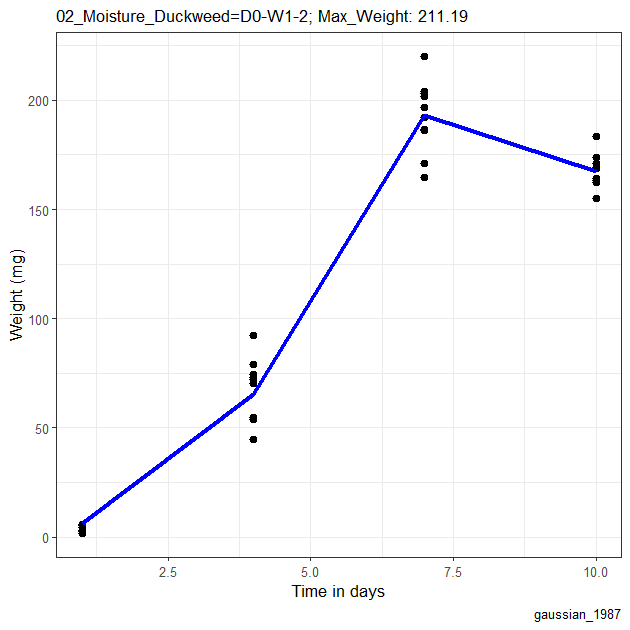

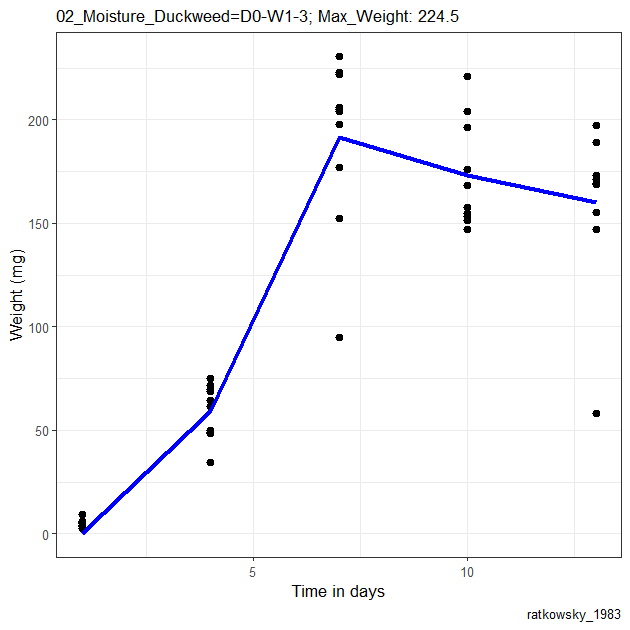

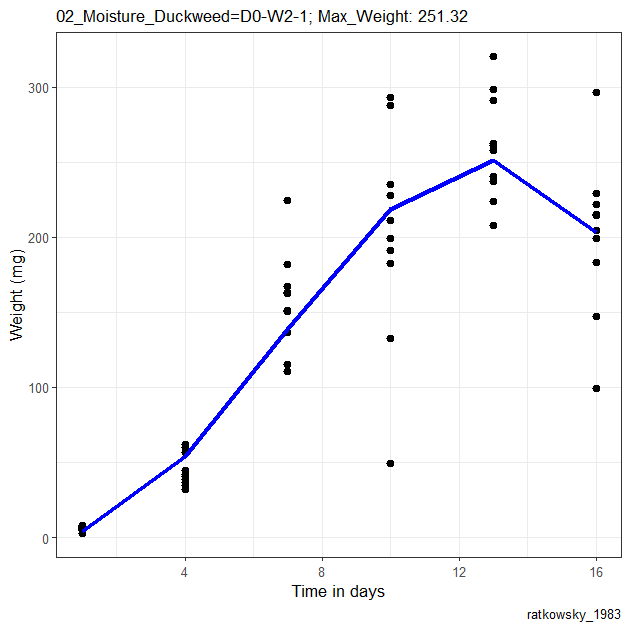

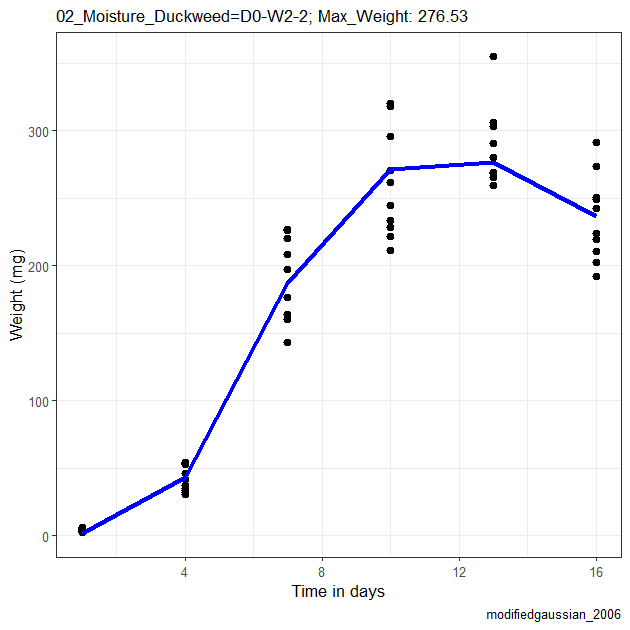

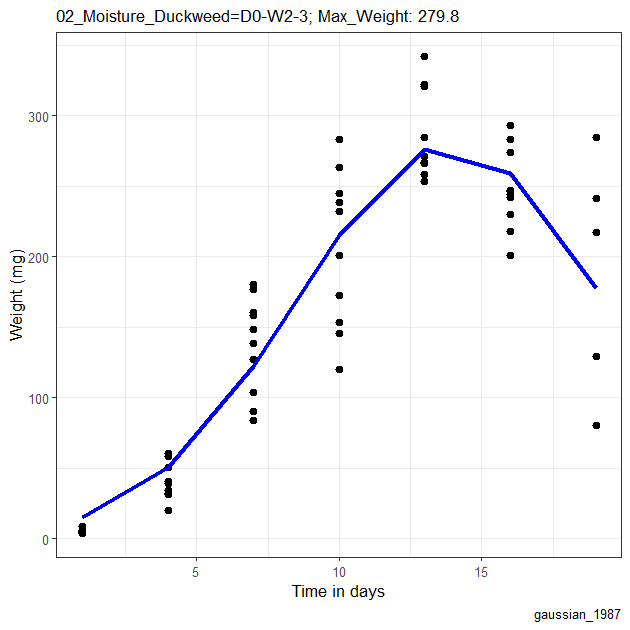

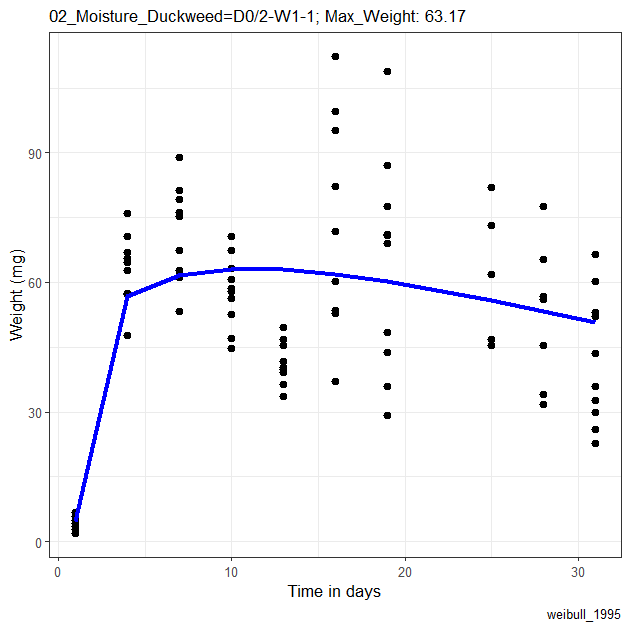

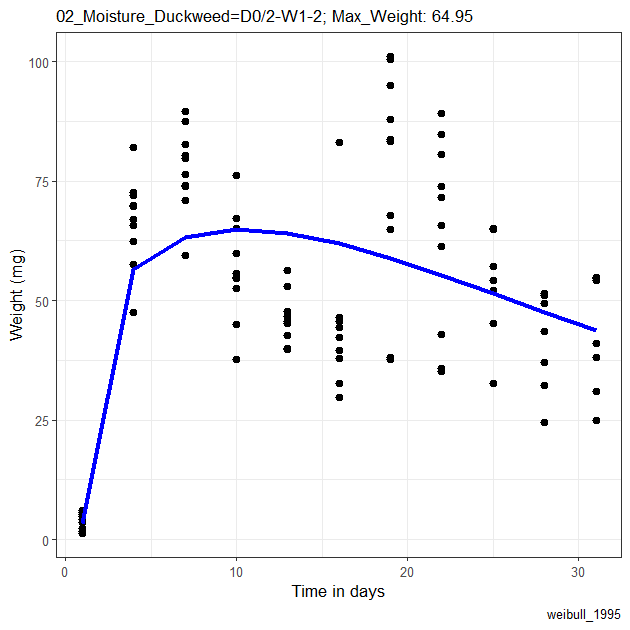

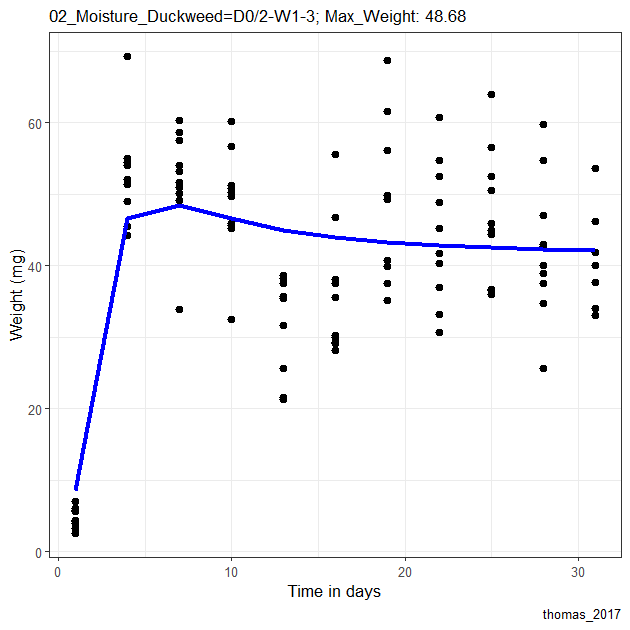

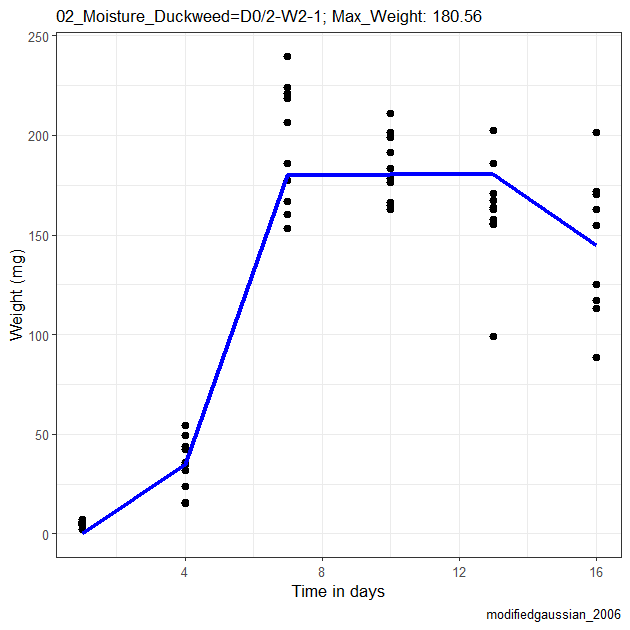

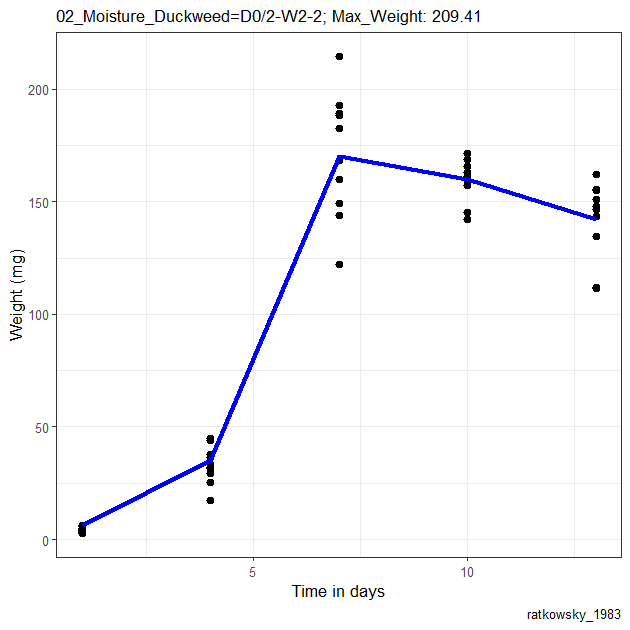

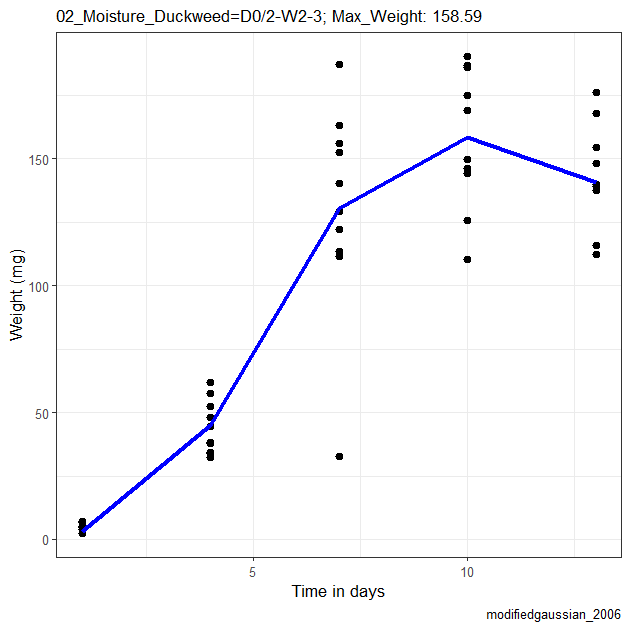

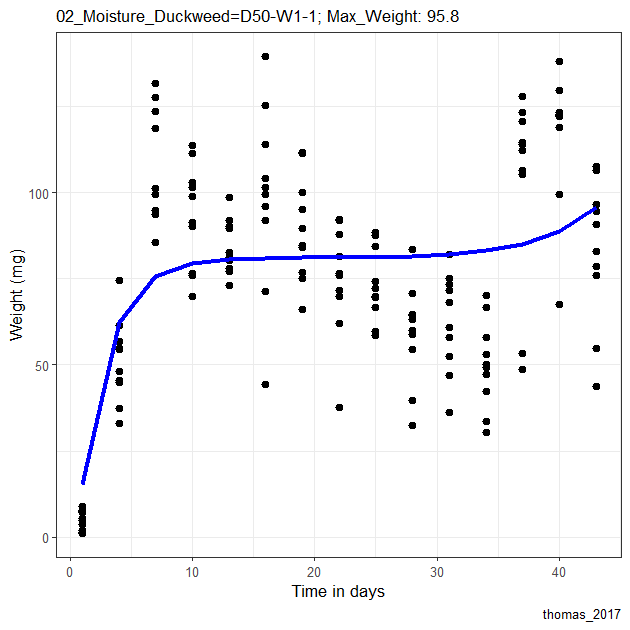

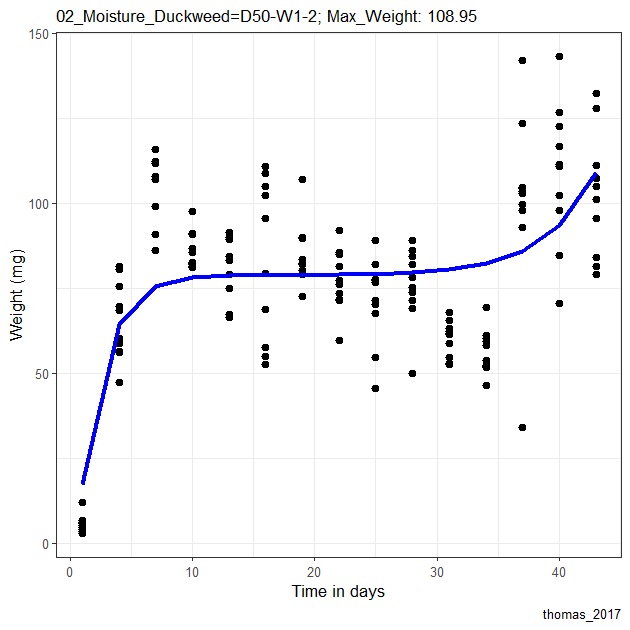

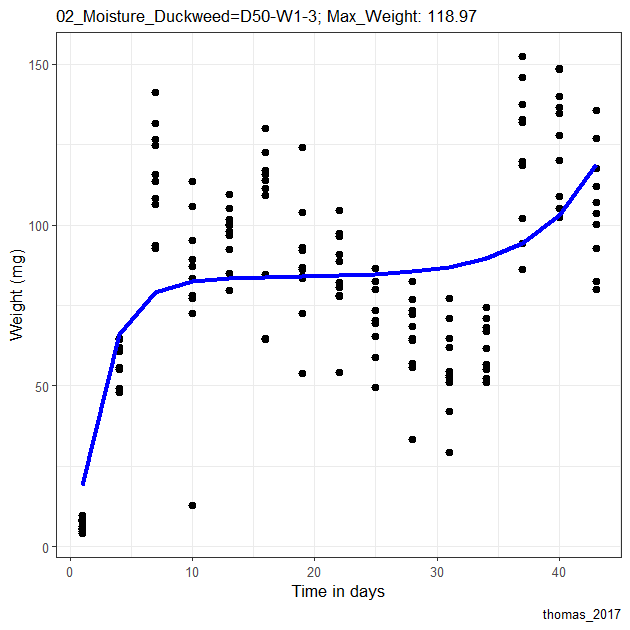

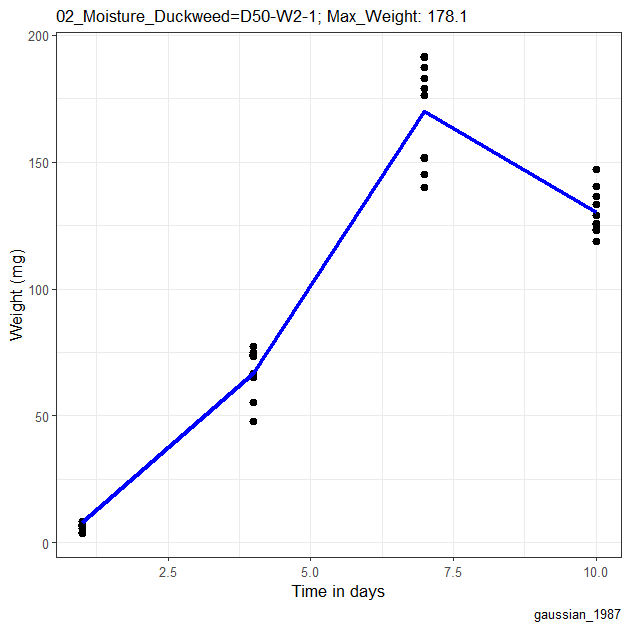

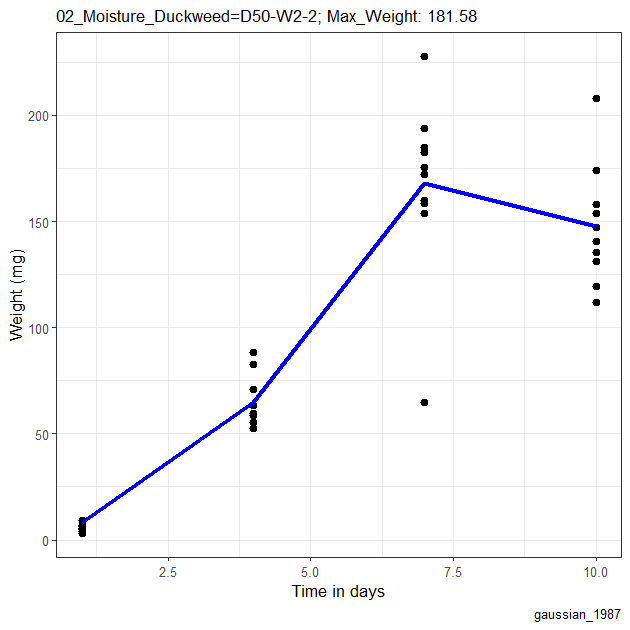

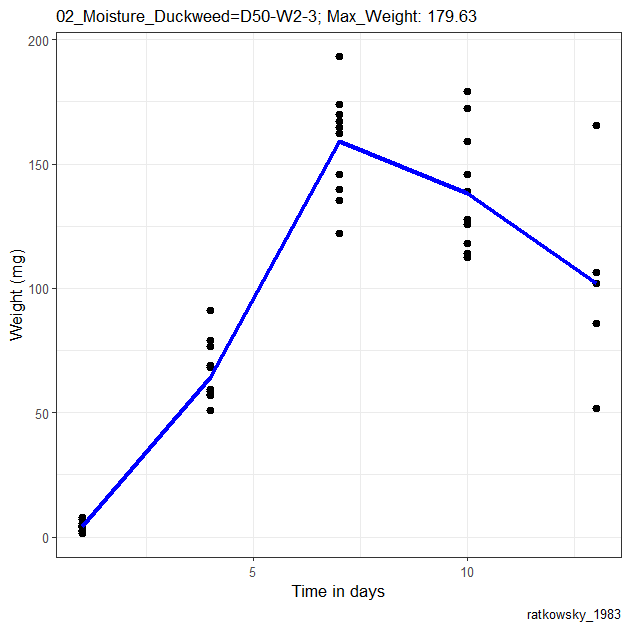

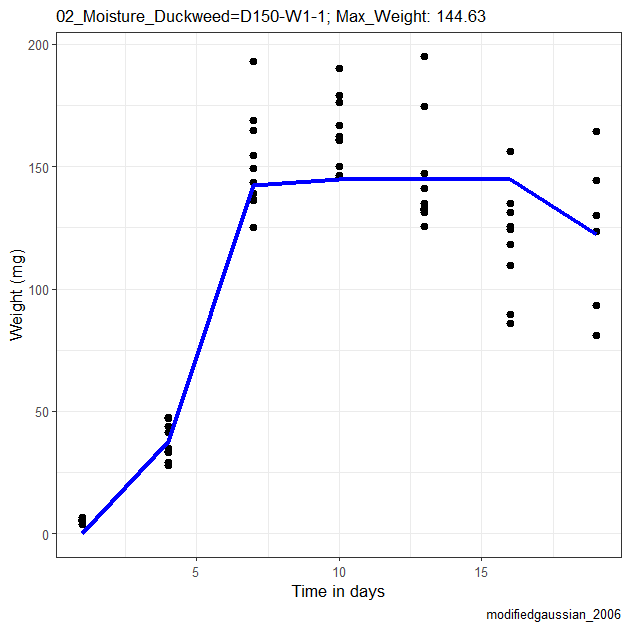

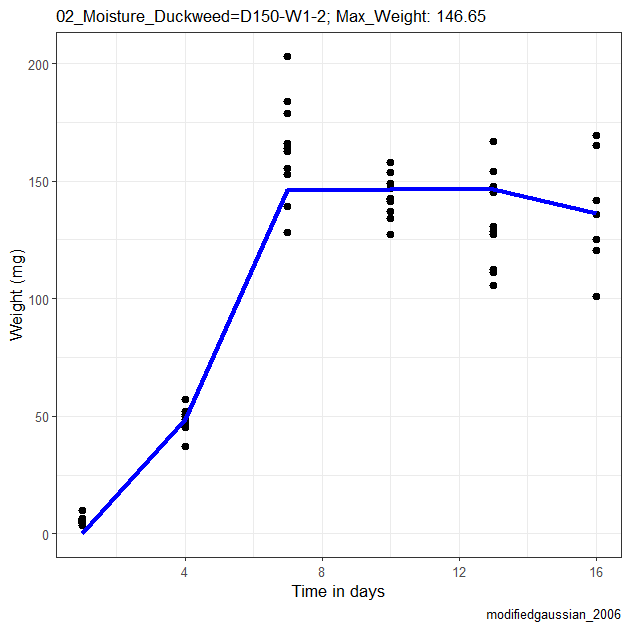

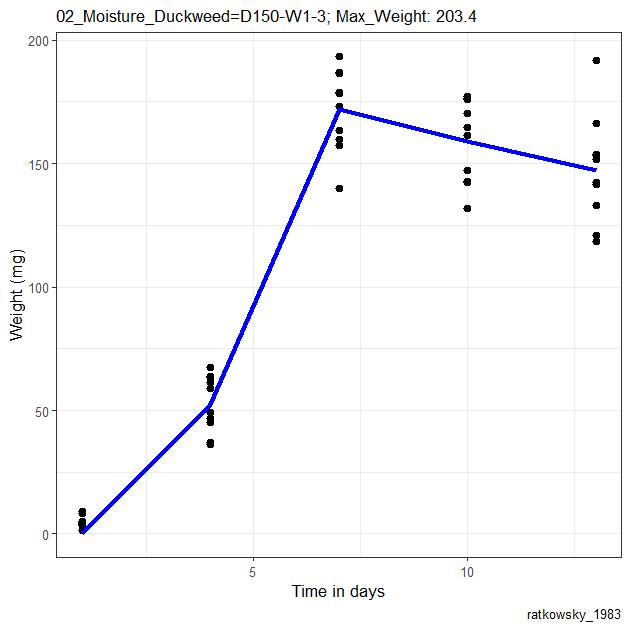

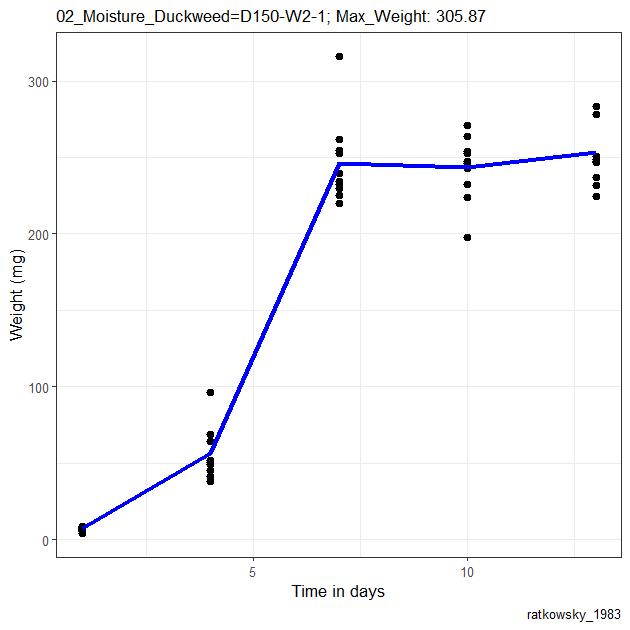

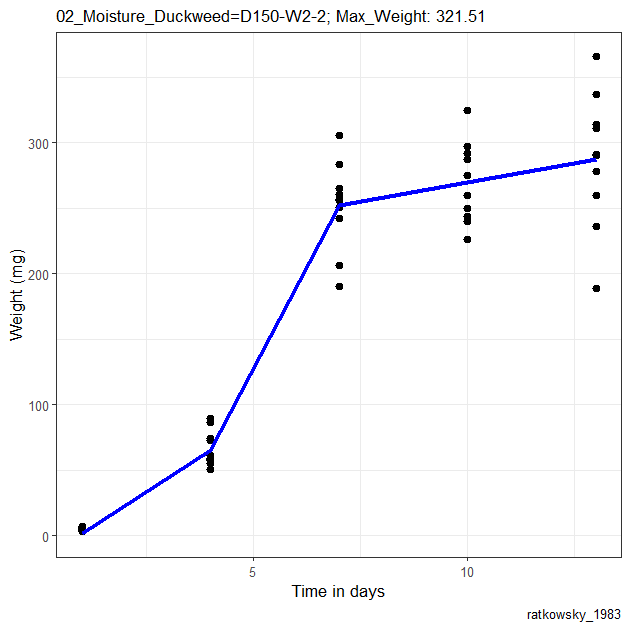

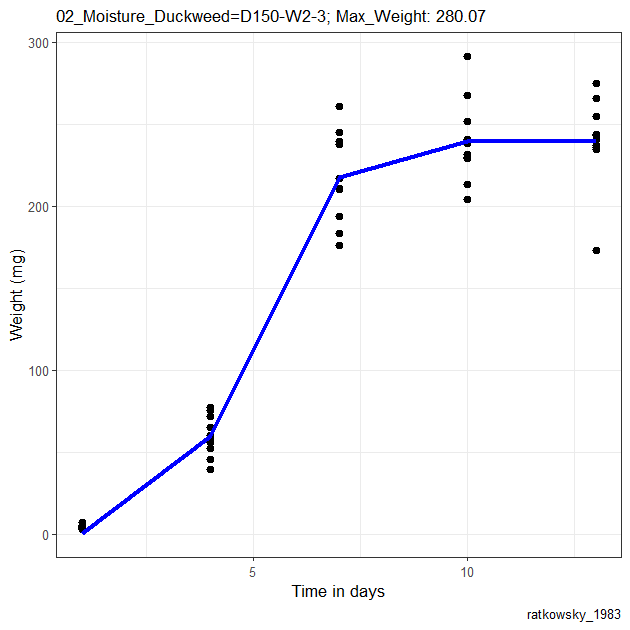

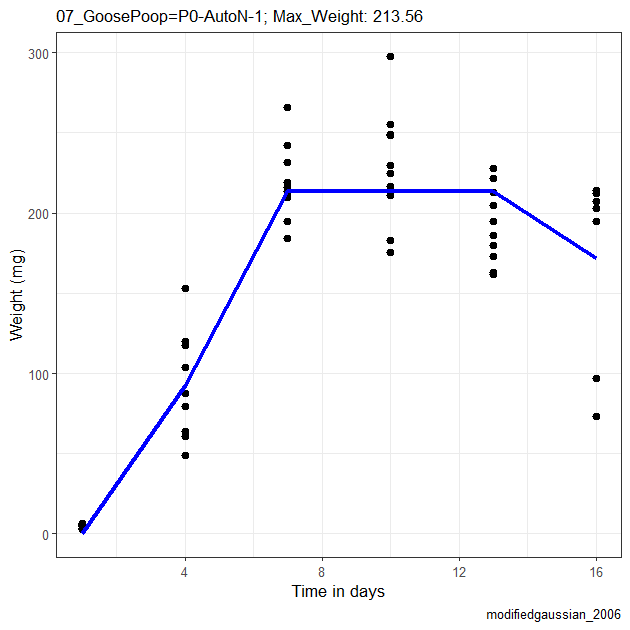

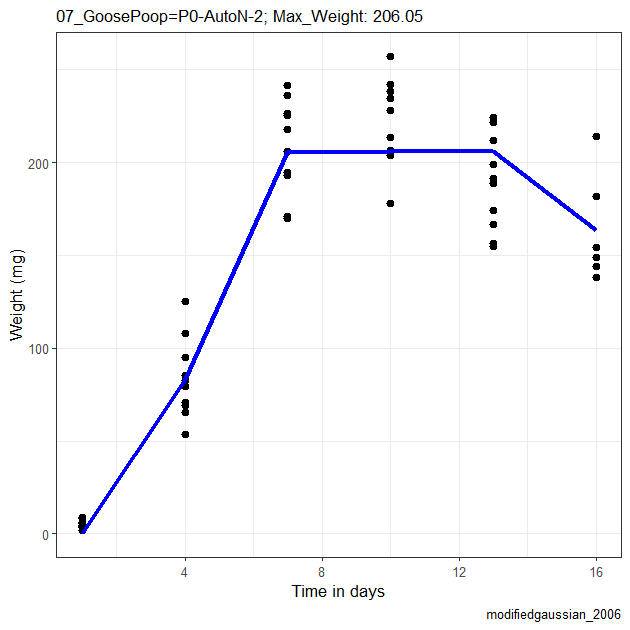

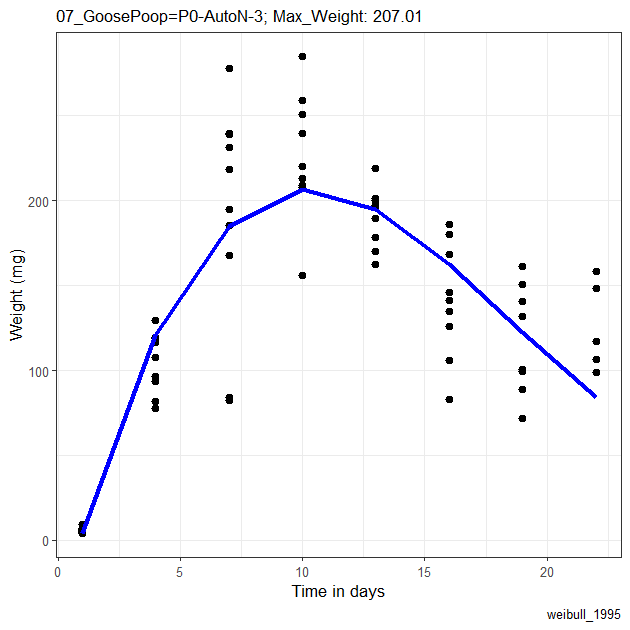

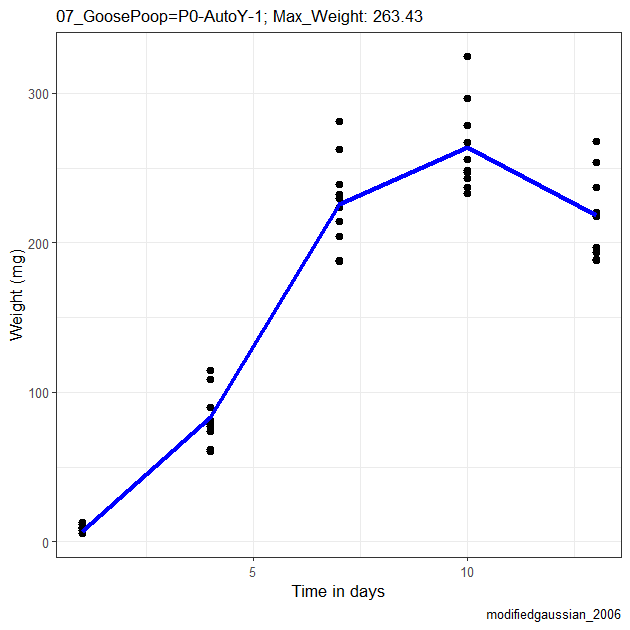

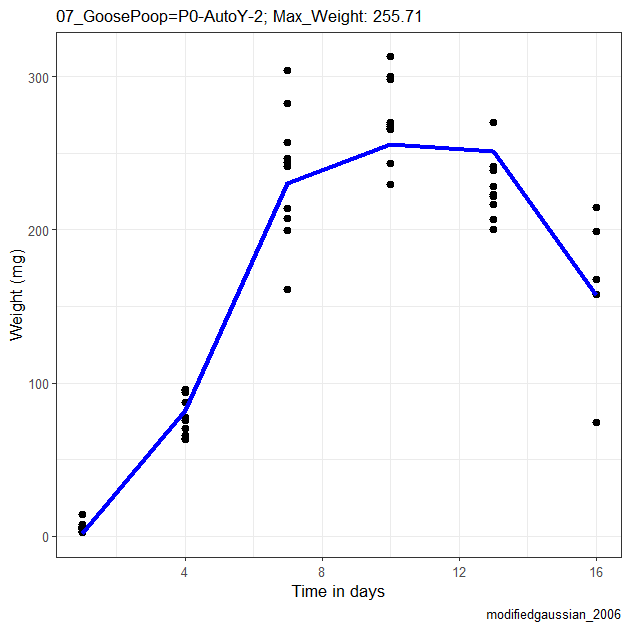

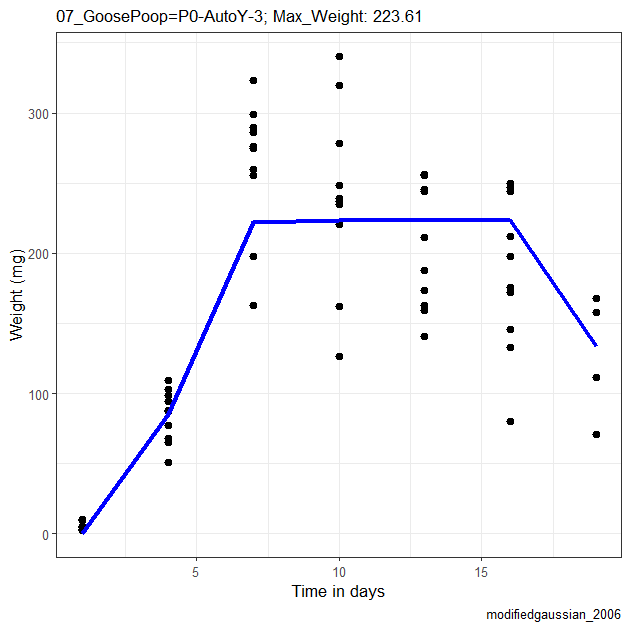

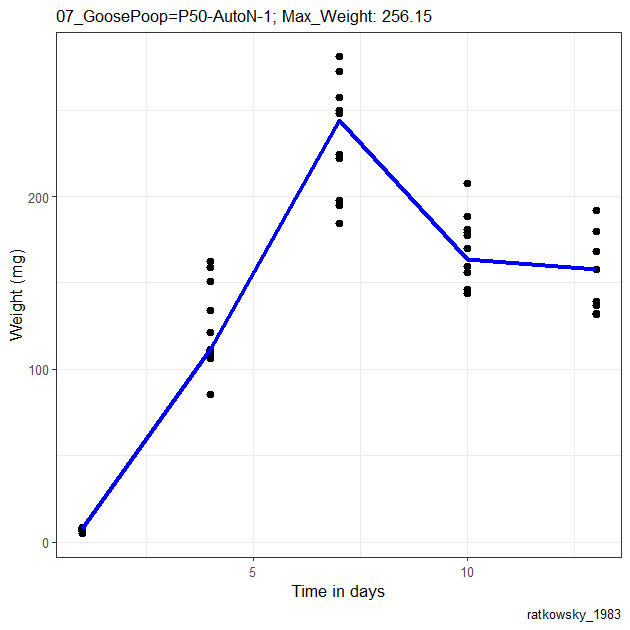

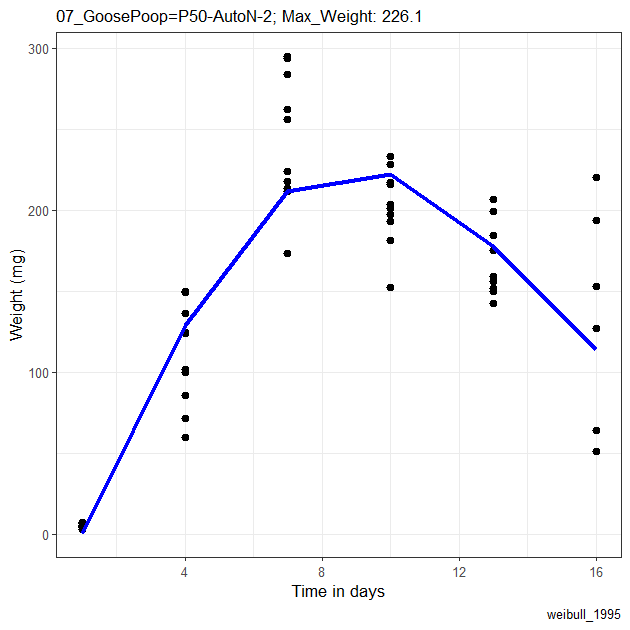

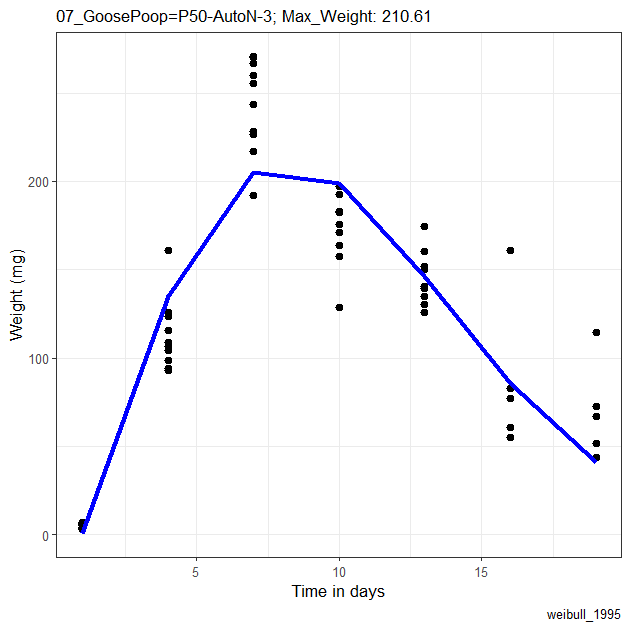

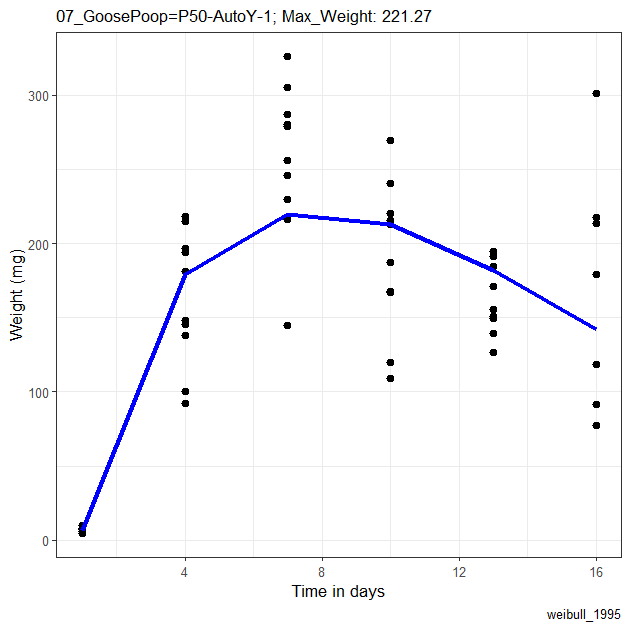

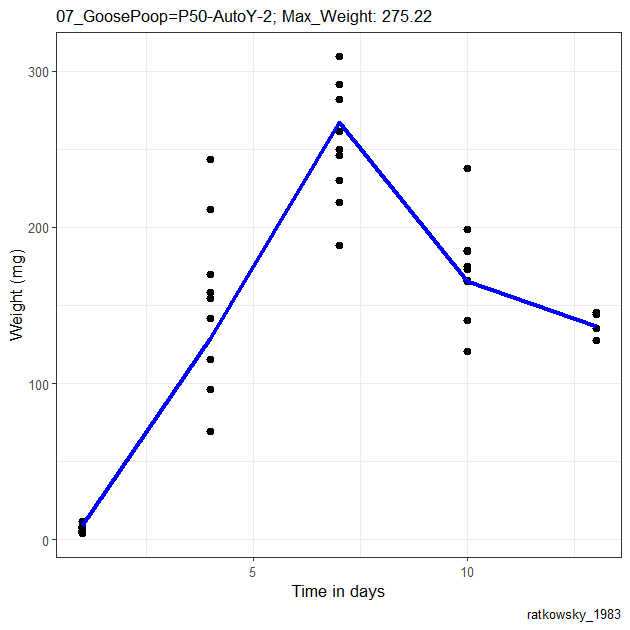

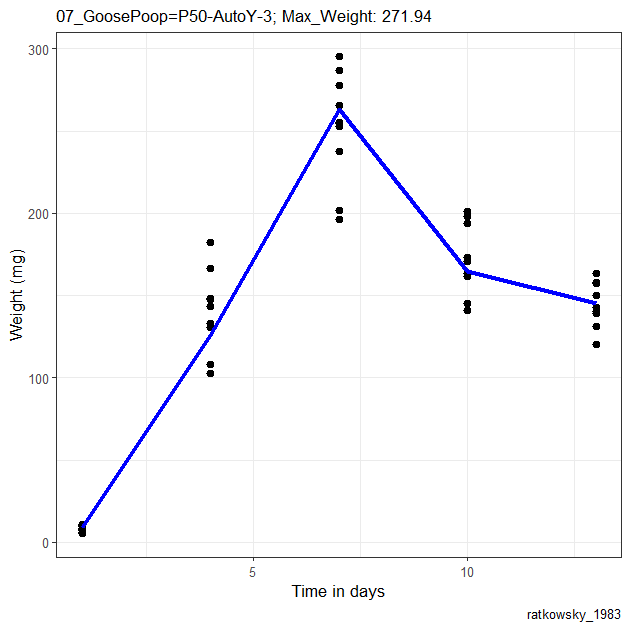

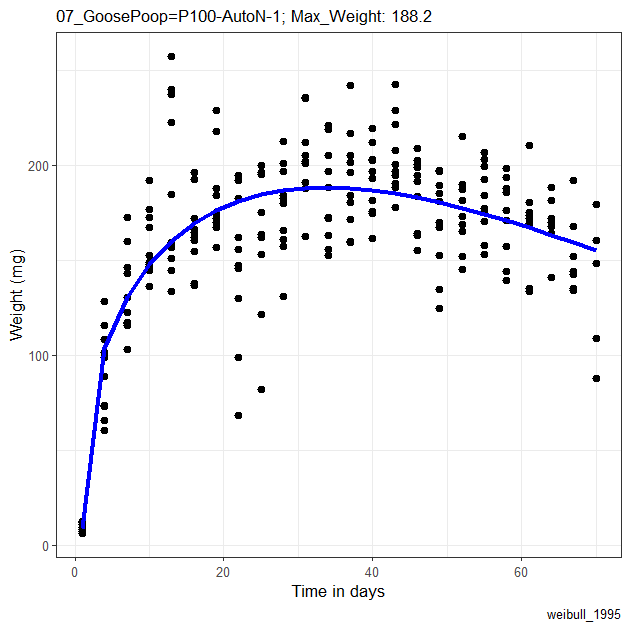

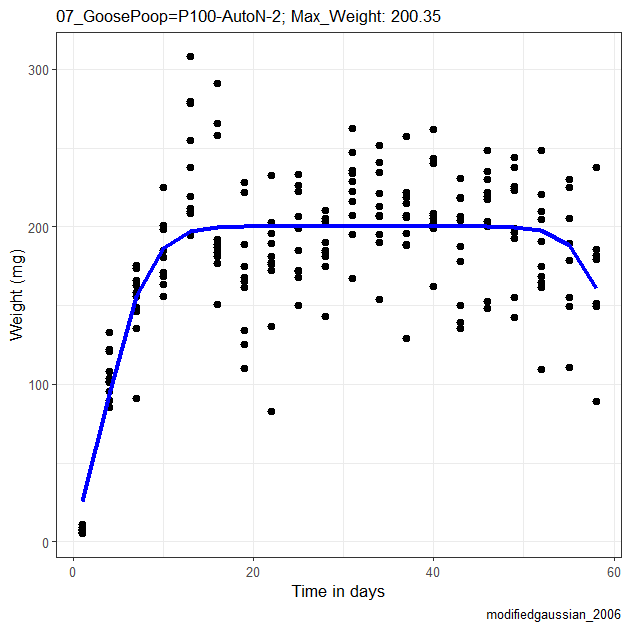

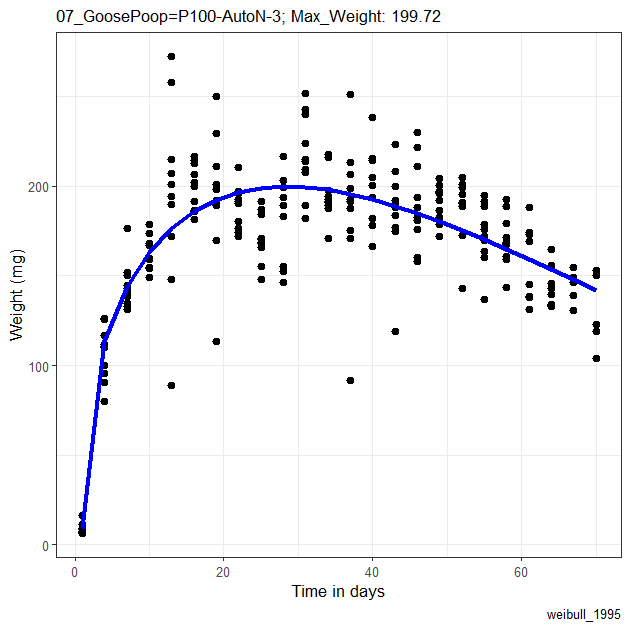

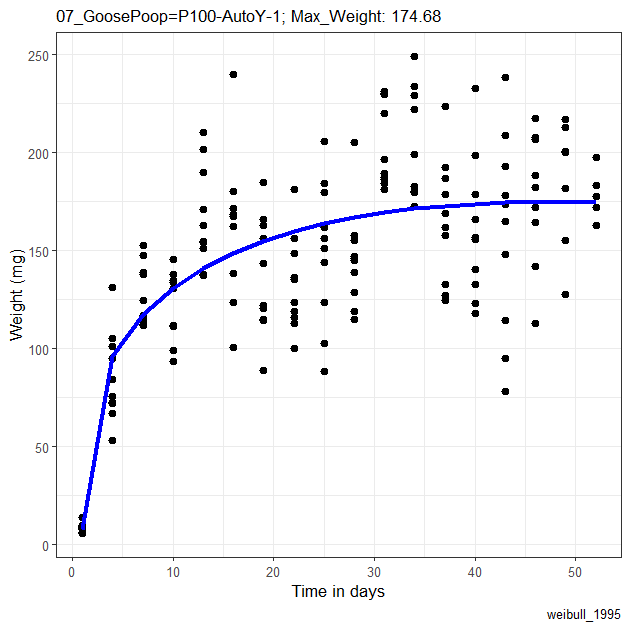

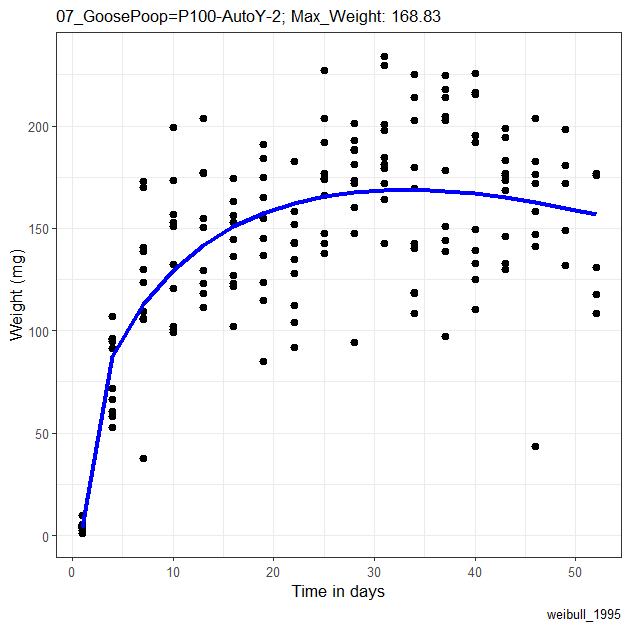

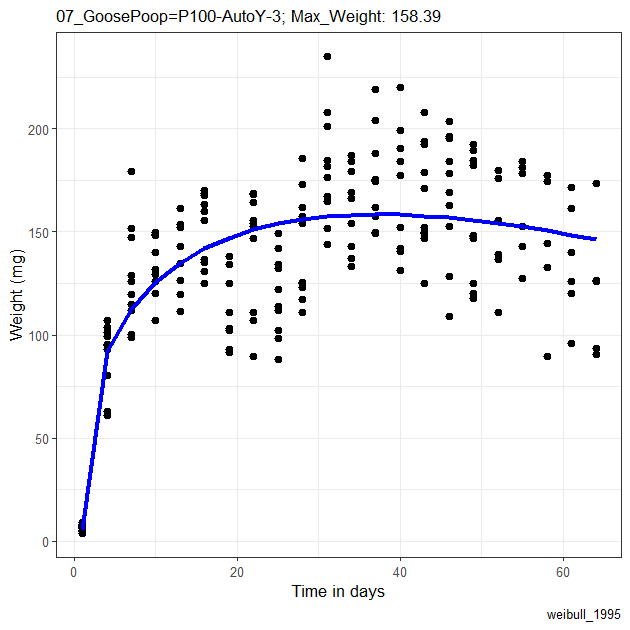


**Table S2.** Average adult lifespan in days (L), average adult dry weight in mg (W), percentage of larval survival (S) and peak larval weight in mg (P) per sample. Columns with “c” represent the average value of those traits in the controls of each experiment (*) and columns with “Δ” show the difference between the measured trait in each sample and the average value of the controls. PC1 shows the final measurement of larval environmental quality per sample.

| **Experiment** | **Sample** | **L** | **Lc** | **ΔL** | **W** | **Wc** | **ΔW** | **S** | **Sc** | **ΔS** | **P** | **Pc** | **ΔP** | **PC1** |
| --- | --- | --- | --- | --- | --- | --- | --- | --- | --- | --- | --- | --- | --- | --- |
| Duckweed | D0-1* | 9.1 | 9.1 | 0.0 | 19.4 | 19.4 | 0.0 | 0.85 | 0.87 | -0.03 | 191.2 | 187.0 | 4.3 | 1.057 |
| D0-2* | 9.1 | 9.1 | 0.0 | 19.4 | 19.4 | 0.0 | 0.84 | 0.87 | -0.03 | 189.4 | 187.0 | 2.4 | 1.029 |
| D0-3* | 9.1 | 9.1 | 0.0 | 19.4 | 19.4 | 0.0 | 0.91 | 0.87 | 0.04 | 168.0 | 187.0 | -19.0 | 0.986 |
| D0-4* | 9.1 | 9.1 | 0.0 | 19.4 | 19.4 | 0.0 | 0.89 | 0.87 | 0.02 | 191.8 | 187.0 | 4.8 | 1.158 |
| D0-5* | 9.1 | 9.1 | 0.0 | 19.4 | 19.4 | 0.0 | 0.87 | 0.87 | -0.01 | 194.4 | 187.0 | 7.4 | 1.128 |
| D25-1 | 9.9 | 9.1 | 0.8 | 10.4 | 19.4 | -9.0 | 0.60 | 0.87 | -0.27 | 154.1 | 187.0 | -32.9 | -0.254 |
| D25-2 | 9.9 | 9.1 | 0.8 | 10.4 | 19.4 | -9.0 | 0.85 | 0.87 | -0.02 | 135.1 | 187.0 | -51.9 | 0.109 |
| D25-3 | 9.9 | 9.1 | 0.8 | 10.4 | 19.4 | -9.0 | 0.85 | 0.87 | -0.03 | 144.3 | 187.0 | -42.7 | 0.182 |
| D25-4 | 9.9 | 9.1 | 0.8 | 10.4 | 19.4 | -9.0 | 0.75 | 0.87 | -0.12 | 137.3 | 187.0 | -49.7 | -0.085 |
| D25-5 | 9.9 | 9.1 | 0.8 | 10.4 | 19.4 | -9.0 | 0.79 | 0.87 | -0.08 | 140.7 | 187.0 | -46.3 | 0.032 |
| D50-1 | 5.7 | 9.1 | -3.4 | 4.1 | 19.4 | -15.3 | 0.48 | 0.87 | -0.39 | 93.5 | 187.0 | -93.5 | -2.370 |
| D50-2 | 5.7 | 9.1 | -3.4 | 4.1 | 19.4 | -15.3 | 0.47 | 0.87 | -0.41 | 72.5 | 187.0 | -114.4 | -2.591 |
| D50-3 | 5.7 | 9.1 | -3.4 | 4.1 | 19.4 | -15.3 | 0.53 | 0.87 | -0.34 | 83.7 | 187.0 | -103.3 | -2.352 |
| D50-4 | 5.7 | 9.1 | -3.4 | 4.1 | 19.4 | -15.3 | 0.49 | 0.87 | -0.38 | 97.0 | 187.0 | -90.0 | -2.316 |
| D50-5 | 5.7 | 9.1 | -3.4 | 4.1 | 19.4 | -15.3 | 0.51 | 0.87 | -0.36 | 94.7 | 187.0 | -92.3 | -2.295 |
| Duckweed and Water | D0-W1-1* | 11.7 | 10.3 | 1.3 | 19.4 | 19.8 | -0.4 | 1.00 | 0.90 | 0.10 | 218.9 | 218.2 | 0.7 | 1.536 |
| D0-W1-2* | 8.0 | 10.3 | -2.3 | 19.3 | 19.8 | -0.5 | 0.81 | 0.90 | -0.09 | 211.2 | 218.2 | -7.0 | 0.289 |
| D0-W1-3* | 11.3 | 10.3 | 1.0 | 20.8 | 19.8 | 1.0 | 0.90 | 0.90 | -0.01 | 224.5 | 218.2 | 6.3 | 1.390 |
| D0-W2-1 | 12.0 | 10.3 | 1.7 | 26.3 | 19.8 | 6.4 | 0.78 | 0.90 | -0.13 | 251.3 | 218.2 | 33.1 | 1.888 |
| D0-W2-2 | 7.1 | 10.3 | -3.2 | 35.3 | 19.8 | 15.5 | 0.88 | 0.90 | -0.03 | 276.5 | 218.2 | 58.3 | 1.937 |
| D0-W2-3 | 9.2 | 10.3 | -1.2 | 28.2 | 19.8 | 8.3 | 0.86 | 0.90 | -0.04 | 279.8 | 218.2 | 61.6 | 1.869 |
| D0/2-W1-1 | 7.3 | 10.3 | -3.0 | 9.9 | 19.8 | -9.9 | 0.06 | 0.90 | -0.85 | 63.2 | 218.2 | -155.0 | -3.452 |
| D0/2-W1-2 | 5.8 | 10.3 | -4.5 | 8.4 | 19.8 | -11.4 | 0.15 | 0.90 | -0.76 | 65.0 | 218.2 | -153.2 | -3.656 |
| D0/2-W1-3 | 6.2 | 10.3 | -4.2 | 14.4 | 19.8 | -5.4 | 0.09 | 0.90 | -0.82 | 48.7 | 218.2 | -169.5 | -3.453 |
| D0/2-W2-1 | 4.2 | 10.3 | -6.2 | 20.2 | 19.8 | 0.3 | 0.90 | 0.90 | -0.01 | 180.6 | 218.2 | -37.6 | -0.545 |
| D0/2-W2-2 | 5.5 | 10.3 | -4.8 | 16.3 | 19.8 | -3.6 | 0.97 | 0.90 | 0.06 | 209.4 | 218.2 | -8.8 | -0.124 |
| D0/2-W2-3 | 8.3 | 10.3 | -2.0 | 17.6 | 19.8 | -2.3 | 0.91 | 0.90 | 0.00 | 158.6 | 218.2 | -59.6 | -0.034 |
| D150-W1-1 | 10.5 | 10.3 | 0.2 | 15.0 | 19.8 | -4.8 | 1.00 | 0.90 | 0.10 | 144.6 | 218.2 | -73.6 | 0.320 |
| D150-W1-2 | 11.7 | 10.3 | 1.3 | 15.4 | 19.8 | -4.4 | 1.00 | 0.90 | 0.10 | 146.7 | 218.2 | -71.5 | 0.609 |
| D150-W1-3 | 9.2 | 10.3 | -1.2 | 14.6 | 19.8 | -5.2 | 1.00 | 0.90 | 0.10 | 203.4 | 218.2 | -14.8 | 0.545 |
| D150-W2-1 | 11.5 | 10.3 | 1.2 | 24.3 | 19.8 | 4.5 | 0.89 | 0.90 | -0.01 | 305.9 | 218.2 | 87.7 | 2.392 |
| D150-W2-2 | 11.3 | 10.3 | 1.0 | 29.1 | 19.8 | 9.3 | 1.00 | 0.90 | 0.10 | 321.5 | 218.2 | 103.3 | 3.062 |
| D150-W2-3 | 12.8 | 10.3 | 2.5 | 25.4 | 19.8 | 5.6 | 0.98 | 0.90 | 0.08 | 280.1 | 218.2 | 61.9 | 2.704 |
| D50-W1-1 | 6.8 | 10.3 | -3.5 | 7.4 | 19.8 | -12.5 | 0.94 | 0.90 | 0.03 | 95.8 | 218.2 | -122.4 | -1.552 |
| D50-W1-2 | 5.7 | 10.3 | -4.7 | 6.3 | 19.8 | -13.6 | 0.76 | 0.90 | -0.15 | 109.0 | 218.2 | -109.2 | -2.137 |
| D50-W1-3 | 5.8 | 10.3 | -4.5 | 7.1 | 19.8 | -12.7 | 0.90 | 0.90 | 0.00 | 119.0 | 218.2 | -99.2 | -1.643 |
| D50-W2-1 | 6.3 | 10.3 | -4.0 | 10.7 | 19.8 | -9.1 | 1.00 | 0.90 | 0.10 | 178.1 | 218.2 | -40.1 | -0.541 |
| D50-W2-2 | 7.3 | 10.3 | -3.0 | 13.1 | 19.8 | -6.7 | 1.00 | 0.90 | 0.10 | 181.6 | 218.2 | -36.6 | -0.136 |
| D50-W2-3 | 5.3 | 10.3 | -5.0 | 12.5 | 19.8 | -7.3 | 1.00 | 0.90 | 0.10 | 179.6 | 218.2 | -38.6 | -0.614 |
| Geese feces | P0-AutoN-1* | 9.8 | 8.6 | 1.2 | 22.6 | 21.3 | 1.4 | 0.89 | 0.95 | -0.06 | 213.6 | 208.9 | 4.7 | 1.333 |
| P0-AutoN-2* | 8.3 | 8.6 | -0.3 | 22.6 | 21.3 | 1.4 | 0.96 | 0.95 | 0.01 | 206.1 | 208.9 | -2.8 | 1.104 |
| P0-AutoN-3* | 7.7 | 8.6 | -0.9 | 18.6 | 21.3 | -2.7 | 1.00 | 0.95 | 0.05 | 207.0 | 208.9 | -1.9 | 0.778 |
| P0-AutoY-1 | 9.0 | 8.6 | 0.4 | 20.8 | 21.3 | -0.4 | 1.00 | 0.95 | 0.05 | 263.4 | 208.9 | 54.6 | 1.723 |
| P0-AutoY-2 | 9.8 | 8.6 | 1.2 | 25.6 | 21.3 | 4.4 | 0.92 | 0.95 | -0.03 | 255.7 | 208.9 | 46.8 | 1.986 |
| P0-AutoY-3 | 9.2 | 8.6 | 0.6 | 22.6 | 21.3 | 1.3 | 0.89 | 0.95 | -0.06 | 223.6 | 208.9 | 14.7 | 1.281 |
| P100-AutoN-1 | 5.5 | 8.6 | -3.1 | 6.0 | 21.3 | -15.3 | 0.87 | 0.95 | -0.08 | 188.2 | 208.9 | -20.7 | -0.986 |
| P100-AutoN-2 | 6.2 | 8.6 | -2.4 | 6.1 | 21.3 | -15.2 | 0.59 | 0.95 | -0.36 | 200.4 | 208.9 | -8.5 | -1.328 |
| P100-AutoN-3 | 6.7 | 8.6 | -1.9 | 6.5 | 21.3 | -14.8 | 0.72 | 0.95 | -0.23 | 199.7 | 208.9 | -9.2 | -0.927 |
| P100-AutoY-1 | 3.7 | 8.6 | -4.9 | 5.5 | 21.3 | -15.8 | 0.88 | 0.95 | -0.07 | 174.7 | 208.9 | -34.2 | -1.505 |
| P100-AutoY-2 | 5.5 | 8.6 | -3.1 | 6.3 | 21.3 | -15.0 | 0.71 | 0.95 | -0.24 | 168.8 | 208.9 | -40.0 | -1.484 |
| P100-AutoY-3 | 4.8 | 8.6 | -3.8 | 5.2 | 21.3 | -16.1 | 0.80 | 0.95 | -0.15 | 158.4 | 208.9 | -50.5 | -1.597 |
| P50-AutoN-1 | 8.3 | 8.6 | -0.3 | 16.9 | 21.3 | -4.4 | 0.95 | 0.95 | 0.00 | 256.2 | 208.9 | 47.3 | 1.142 |
| P50-AutoN-2 | 8.2 | 8.6 | -0.4 | 20.5 | 21.3 | -0.8 | 0.91 | 0.95 | -0.04 | 226.1 | 208.9 | 17.2 | 0.997 |
| P50-AutoN-3 | 5.8 | 8.6 | -2.8 | 20.4 | 21.3 | -0.9 | 0.94 | 0.95 | -0.01 | 210.6 | 208.9 | 1.7 | 0.425 |
| P50-AutoY-1 | 8.3 | 8.6 | -0.3 | 18.7 | 21.3 | -2.5 | 0.87 | 0.95 | -0.08 | 221.3 | 208.9 | 12.4 | 0.781 |
| P50-AutoY-2 | 9.2 | 8.6 | 0.6 | 16.7 | 21.3 | -4.6 | 1.00 | 0.95 | 0.05 | 275.2 | 208.9 | 66.3 | 1.580 |
| P50-AutoY-3 | 6.2 | 8.6 | -2.4 | 15.7 | 21.3 | -5.6 | 0.89 | 0.95 | -0.06 | 271.9 | 208.9 | 63.1 | 0.623 |
